# Supplementary material for: Tracking endocytosis and intracellular distribution of spherical nucleic acids with correlative single-cell imaging
Source: Springer Nature journal article supplement (doi:10.1038/s41596-020-00420-1), 2020-12-07
Supplement: MOESM4 [file 41596_2020_420_MOESM4_ESM23.xlsx]

## Sheet: Uv-Vis
nm	Au	Au-DNA
800	0.003945	0.003754
799	0.00374	0.003704
798	0.003733	0.003627
797	0.003639	0.003456
796	0.003688	0.003361
795	0.003782	0.003493
794	0.00393	0.003617
793	0.004117	0.004121
792	0.004141	0.003678
791	0.004086	0.003849
790	0.004627	0.004356
789	0.004454	0.003956
788	0.004235	0.004381
787	0.005	0.00456
786	0.004769	0.004469
785	0.004969	0.004811
784	0.00501	0.00462
783	0.004916	0.004503
782	0.005085	0.004762
781	0.004995	0.004593
780	0.005127	0.004671
779	0.005235	0.004926
778	0.005473	0.005276
777	0.005515	0.0053
776	0.005658	0.005154
775	0.005572	0.005237
774	0.005983	0.005707
773	0.006037	0.005698
772	0.006204	0.005701
771	0.005858	0.005698
770	0.006249	0.006272
769	0.00625	0.006252
768	0.006506	0.006414
767	0.006527	0.006271
766	0.006388	0.006527
765	0.006747	0.006919
764	0.006745	0.006808
763	0.006916	0.006697
762	0.007048	0.007267
761	0.00719	0.007459
760	0.007128	0.007239
759	0.0071	0.00719
758	0.00735	0.007442
757	0.007452	0.007686
756	0.007562	0.00793
755	0.007699	0.008039
754	0.007807	0.008403
753	0.00828	0.008904
752	0.008311	0.008676
751	0.00818	0.008669
750	0.008232	0.008858
749	0.008744	0.009491
748	0.008551	0.009161
747	0.008856	0.009544
746	0.008935	0.009947
745	0.009075	0.010208
744	0.009109	0.010233
743	0.009167	0.010307
742	0.009191	0.010191
741	0.009519	0.010676
740	0.009447	0.010864
739	0.009703	0.011108
738	0.009915	0.011273
737	0.009988	0.011423
736	0.010062	0.011716
735	0.010224	0.012004
734	0.010295	0.012174
733	0.010757	0.012574
732	0.010899	0.012472
731	0.010922	0.01254
730	0.011056	0.012929
729	0.011016	0.013246
728	0.01124	0.013499
727	0.011421	0.013776
726	0.011724	0.014061
725	0.011897	0.014208
724	0.012173	0.014662
723	0.012518	0.014887
722	0.012556	0.015253
721	0.012798	0.015539
720	0.012828	0.015778
719	0.013222	0.016116
718	0.013366	0.016403
717	0.013456	0.016522
716	0.013237	0.016655
715	0.013517	0.01702
714	0.013687	0.017333
713	0.013909	0.017615
712	0.014249	0.017903
711	0.014504	0.018264
710	0.01464	0.018567
709	0.014616	0.018598
708	0.014853	0.018986
707	0.01531	0.019649
706	0.015557	0.019779
705	0.015609	0.020064
704	0.015842	0.02043
703	0.016057	0.020654
702	0.016418	0.021101
701	0.016572	0.021452
700	0.017023	0.02209
699	0.017461	0.022546
698	0.017727	0.022938
697	0.017913	0.023311
696	0.017994	0.02357
695	0.018189	0.023921
694	0.018527	0.024334
693	0.018749	0.024691
692	0.01901	0.025135
691	0.019154	0.025386
690	0.019277	0.025485
689	0.019701	0.025994
688	0.020221	0.026655
687	0.020713	0.027154
686	0.020817	0.027336
685	0.021012	0.027856
684	0.021313	0.028292
683	0.021613	0.028639
682	0.022081	0.029178
681	0.022329	0.029716
680	0.022752	0.030191
679	0.023141	0.030527
678	0.023419	0.031
677	0.023722	0.031525
676	0.024035	0.032101
675	0.024592	0.032646
674	0.025126	0.033007
673	0.025385	0.033495
672	0.025658	0.034084
671	0.026036	0.034601
670	0.026635	0.035267
669	0.02713	0.035909
668	0.027493	0.036367
667	0.028049	0.03687
666	0.028495	0.037349
665	0.028942	0.037808
664	0.029484	0.038514
663	0.030029	0.039214
662	0.030615	0.039839
661	0.031169	0.040435
660	0.031673	0.041007
659	0.032253	0.04174
658	0.032887	0.042439
657	0.033505	0.042994
656	0.034141	0.043667
655	0.034828	0.044473
654	0.035503	0.045138
653	0.036168	0.045759
652	0.036809	0.04642
651	0.037398	0.047074
650	0.038019	0.04774
649	0.038765	0.04839
648	0.039545	0.049086
647	0.040255	0.049644
646	0.041049	0.050373
645	0.041818	0.051218
644	0.042672	0.05189
643	0.043582	0.052604
642	0.04436	0.053296
641	0.045181	0.054096
640	0.046098	0.0549
639	0.047088	0.055618
638	0.048113	0.056466
637	0.04894	0.057274
636	0.049909	0.058071
635	0.051229	0.058989
634	0.052435	0.059863
633	0.053488	0.060707
632	0.054581	0.061551
631	0.055787	0.062487
630	0.057113	0.063494
629	0.058444	0.064448
628	0.059684	0.065476
627	0.060973	0.066601
626	0.062423	0.067726
625	0.063855	0.068645
624	0.065414	0.069662
623	0.067046	0.070853
622	0.068703	0.072083
621	0.070276	0.073271
620	0.071912	0.074347
619	0.073486	0.075406
618	0.075155	0.076563
617	0.07699	0.07777
616	0.079019	0.079119
615	0.081149	0.08051
614	0.083191	0.081917
613	0.085383	0.083556
612	0.087486	0.084967
611	0.089646	0.086434
610	0.092231	0.08813
609	0.094768	0.089758
608	0.097275	0.091509
607	0.099954	0.093291
606	0.102632	0.095089
605	0.105506	0.096948
604	0.108405	0.098852
603	0.111348	0.100698
602	0.114493	0.102667
601	0.117746	0.104752
600	0.121304	0.107014
599	0.125002	0.109395
598	0.128381	0.111613
597	0.132129	0.113847
596	0.136163	0.116314
595	0.140172	0.118767
594	0.144386	0.121368
593	0.148884	0.124174
592	0.153484	0.127049
591	0.158102	0.130229
590	0.162938	0.133438
589	0.168163	0.136599
588	0.173429	0.139834
587	0.178769	0.142998
586	0.184173	0.146228
585	0.189483	0.149278
584	0.195351	0.15254
583	0.201957	0.156426
582	0.208759	0.160275
581	0.215664	0.163792
580	0.222484	0.167579
579	0.22961	0.171525
578	0.237152	0.175664
577	0.244798	0.179833
576	0.252745	0.184212
575	0.260835	0.188633
574	0.269289	0.193063
573	0.27799	0.197675
572	0.286935	0.202313
571	0.296348	0.207192
570	0.305902	0.212272
569	0.315599	0.217161
568	0.325591	0.222212
567	0.336079	0.22753
566	0.346696	0.232821
565	0.357382	0.238071
564	0.368798	0.243805
563	0.380207	0.249343
562	0.391682	0.25331
561	0.403769	0.258395
560	0.415805	0.264137
559	0.428114	0.269656
558	0.440585	0.275164
557	0.453299	0.280798
556	0.46607	0.286388
555	0.47885	0.291873
554	0.491481	0.297178
553	0.504539	0.302555
552	0.517968	0.308227
551	0.531152	0.313482
550	0.544358	0.31889
549	0.557186	0.323839
548	0.569852	0.328652
547	0.582168	0.333191
546	0.594425	0.337427
545	0.606246	0.341696
544	0.617826	0.345843
543	0.62873	0.349617
542	0.639313	0.353125
541	0.64928	0.356341
540	0.658873	0.359411
539	0.667687	0.362159
538	0.675397	0.364363
537	0.682535	0.366076
536	0.688591	0.367558
535	0.693997	0.368652
534	0.698316	0.369278
533	0.701974	0.369729
532	0.704067	0.369471
531	0.705557	0.368941
530	0.70598	0.368061
529	0.705664	0.367107
528	0.704302	0.365598
527	0.701752	0.363441
526	0.698149	0.361035
525	0.693719	0.35851
524	0.68843	0.355349
523	0.682563	0.352184
522	0.675931	0.348886
521	0.668627	0.345425
520	0.660583	0.341577
519	0.652198	0.337706
518	0.643405	0.333662
517	0.633968	0.329589
516	0.624475	0.325601
515	0.614607	0.321369
514	0.604479	0.317133
513	0.594178	0.312777
512	0.584035	0.308562
511	0.574101	0.304268
510	0.563482	0.300297
509	0.553371	0.296095
508	0.543475	0.291939
507	0.533538	0.287914
506	0.523614	0.283671
505	0.513708	0.279319
504	0.503914	0.274877
503	0.494469	0.270768
502	0.484887	0.266364
501	0.475729	0.261898
500	0.466834	0.257429
499	0.458394	0.253367
498	0.449994	0.249145
497	0.441932	0.245005
496	0.434224	0.241057
495	0.426949	0.237291
494	0.419773	0.233442
493	0.413172	0.230085
492	0.407003	0.226753
491	0.400992	0.223458
490	0.395277	0.220473
489	0.390186	0.217454
488	0.385066	0.214804
487	0.380461	0.212255
486	0.376083	0.209775
485	0.371885	0.207146
484	0.367944	0.204721
483	0.36371	0.201529
482	0.3593	0.198271
481	0.356437	0.196694
480	0.354507	0.195879
479	0.353312	0.196627
478	0.351682	0.196561
477	0.349918	0.195826
476	0.348277	0.195195
475	0.34669	0.194522
474	0.34506	0.193966
473	0.344037	0.193512
472	0.342616	0.192929
471	0.341643	0.192441
470	0.340757	0.192237
469	0.34019	0.192136
468	0.339672	0.192192
467	0.339347	0.192556
466	0.339229	0.192865
465	0.339073	0.193287
464	0.339239	0.193845
463	0.339064	0.194168
462	0.339173	0.194509
461	0.339065	0.1949
460	0.339067	0.195185
459	0.339304	0.195374
458	0.339436	0.195596
457	0.33961	0.195789
456	0.339744	0.19581
455	0.33966	0.195773
454	0.339509	0.19548
453	0.339554	0.19556
452	0.339582	0.195425
451	0.339592	0.195425
450	0.339907	0.195434
449	0.340109	0.195374
448	0.340195	0.195453
447	0.34066	0.195727
446	0.341106	0.196078
445	0.340775	0.195136
444	0.340097	0.193813
443	0.34064	0.193798
442	0.341067	0.194037
441	0.341405	0.194361
440	0.342104	0.194893
439	0.342759	0.195298
438	0.343223	0.195384
437	0.343873	0.195923
436	0.344395	0.196027
435	0.344979	0.196304
434	0.345427	0.196374
433	0.346244	0.19674
432	0.346794	0.197115
431	0.347279	0.197424
430	0.348003	0.197634
429	0.34867	0.198127
428	0.349104	0.198086
427	0.349961	0.198587
426	0.350508	0.199127
425	0.35128	0.199385
424	0.352025	0.199674
423	0.352836	0.199993
422	0.353449	0.200273
421	0.354091	0.200619
420	0.354677	0.200842

## Sheet: Fluo
Wavelength	Intensity
550	0.81004
551	0.8331
552	0.85752
553	0.88591
554	0.9132
555	0.92612
556	0.9571
557	0.97747
558	0.98006
559	1
560	0.99463
561	0.99274
562	0.97721
563	0.95813
564	0.93709
565	0.92533
566	0.88962
567	0.85298
568	0.83045
569	0.79219
570	0.75611
571	0.71752
572	0.6715
573	0.63937
574	0.60303
575	0.58073
576	0.55834
577	0.53571
578	0.5
579	0.4782
580	0.46459
581	0.46528
582	0.4408
583	0.41599
584	0.39565
585	0.3712
586	0.35208
587	0.33631
588	0.32091
589	0.30822
590	0.30219
591	0.3014
592	0.28738
593	0.28136
594	0.28059
595	0.27539
596	0.2687
597	0.26433
598	0.25674
599	0.25562
600	0.25571
601	0.2412
602	0.23783
603	0.23614
604	0.22971
605	0.2265
606	0.22176
607	0.21457
608	0.20808
609	0.20357
610	0.20052
611	0.19184
612	0.1821
613	0.17892
614	0.1717
615	0.16541
616	0.15617
617	0.15
618	0.14397
619	0.14556
620	0.1338
621	0.13347
622	0.12274
623	0.11674
624	0.11333
625	0.10396
626	0.10084
627	0.09915
628	0.09561
629	0.08428
630	0.08454
631	0.08643
632	0.0808
633	0.07325
634	0.07099
635	0.07007
636	0.06477
637	0.06208
638	0.06135
639	0.05665
640	0.05459
641	0.05357
642	0.05615
643	0.05105
644	0.04966
645	0.04688
646	0.04784
647	0.04654
648	0.04439
649	0.03982
650	0.04131
651	0.04114
652	0.0431
653	0.03942
654	0.03972
655	0.04038
656	0.03618
657	0.0372
658	0.03462
659	0.03164
660	0.02975
661	0.02597
662	0.03088
663	0.03031
664	0.02654
665	0.02475
666	0.02657
667	0.02299
668	0.02504
669	0.02299
670	0.01994
671	0.02054
672	0.02064
673	0.01974
674	0.01994
675	0.01593
676	0.01799
677	0.01769
678	0.0162
679	0.01805
680	0.0164
681	0.01577
682	0.01328
683	0.01507
684	0.01398
685	0.01388
686	0.01355
687	0.01219
688	0.01209
689	0.01
690	0.00987
691	0.0113
692	0.01024
693	0.01103
694	0.01027
695	0.0101
696	0.00974
697	0.0102
698	0.00931
699	0.00997
700	0.00944
701	0.00885
702	0.00729
703	0.00878
704	0.00881
705	0.00795
706	0.00702
707	0.00795
708	0.00656
709	0.00755
710	0.00755
711	0.00792
712	0.00775
713	0.00679
714	0.00732
715	0.00633
716	0.00633
717	0.00474
718	0.00573
719	0.00769
720	0.00928
721	0.00971
722	0.00961
723	0.00938
724	0.00782
725	0.00649
726	0.00586
727	0.0055
728	0.00282
729	0.00454
730	0.00318
731	0.0056
732	0.00504
733	0.00384
734	0.00371
735	0.0053
736	0.00414
737	0.00494
738	0.00371
739	0.00298
740	0.00345
741	0.00285
742	0.00328
743	0.00388
744	0.00371
745	0.00417
746	0.00325
747	0.00401
748	0.00404
749	0.00378
750	0.00388
751	0.00272
752	0.00441
753	0.00414
754	0.00285
755	0.00358
756	0.00394
757	0.00348
758	0.00182
759	0.00288
760	0.00308
761	0.00348
762	0.00494
763	0.00407
764	0.00205
765	0
766	0.00222
767	0.00139
768	0.00209
769	0.000993838
770	0.00285
771	0.00162
772	0.00212
773	0.00235
774	0.00199
775	0.00129
776	0.000993838
777	0.00169
778	0.00113
779	0.00301
780	0.00159
781	0.00321
782	0.00129
783	0.00133
784	0.00229
785	0.00345
786	0.00149
787	0.00285
788	0.000132512
789	0.00136
790	0.00417
791	0.00908
792	0.01921
793	0.03485
794	0.04787
795	0.05711
796	0.05834
797	0.04906
798	0.03727
799	0.02534
800	0.01385

## Sheet: DLS
X Volume	AuNPs	SNAs
0.4	0	0
0.463	0	0
0.536	0	0
0.621	0	0
0.719	0	0
0.833	0	0
0.965	0	0
1.12	0	0
1.29	0	0
1.5	0	0
1.74	0	0
2.01	0	0
2.33	0	0
2.7	0	0
3.12	0	0
3.62	0	0
4.19	0	0
4.85	0	0
5.61	0	0
6.5	0	0
7.53	0	0
8.72	0	0
10.1	0	0
11.7	0	0
13.5	0	0
15.7	0	0
18.2	0	0
21	0	0
24.4	1.91	0
28.2	7.72	0
32.7	14.6	1.31
37.8	18.2	6
43.8	17.7	12.6
50.7	14.4	16.7
58.8	10.2	16.5
68.1	6.47	13.3
78.8	3.75	9.49
91.3	2.1	6.45
106	1.23	4.63
122	0.789	3.74
142	0.514	3.27
164	0.287	2.73
190	0.109	1.92
220	0.0196	1.01
255	0	0.331
295	0	0.0488
342	0	0
396	0	0
459	0	0
531	0	0
615	0	0
712	0	0
825	0	0
955	0	0
1110	0	0
1280	0	0
1480	0	0
1720	0	0
1990	0	0
2300	0	0
2670	0	0
3090	0	0
3580	0	0
4150	0	0
4800	0	0
5560	0	0
6440	0	0
7460	0	0
8630	0	0
