# Supplementary material for: Tracking endocytosis and intracellular distribution of spherical nucleic acids with correlative single-cell imaging
Source: Springer Nature journal article supplement (doi:10.1038/s41596-020-00420-1), 2020-12-07
Supplement: MOESM5 [file 41596_2020_420_MOESM5_ESM24.xlsx]

## Sheet: 5b
single		small		large
wavelength	value	wavelength	value	wavelength	value
410.077	0.07118	440.312	0.07901	440.312	0.18844
410.352	0.07011	440.587	0.0793	440.587	0.18901
410.627	0.06905	440.861	0.07959	440.861	0.18958
410.902	0.06799	441.136	0.07988	441.136	0.19015
411.178	0.06694	441.41	0.08018	441.41	0.19072
411.453	0.06591	441.685	0.08047	441.685	0.19128
411.728	0.06488	441.959	0.08077	441.959	0.19185
412.003	0.06386	442.234	0.08106	442.234	0.19241
412.278	0.06284	442.508	0.08136	442.508	0.19298
412.554	0.06184	442.783	0.08166	442.783	0.19354
412.829	0.06085	443.057	0.08195	443.057	0.1941
413.104	0.05986	443.332	0.08225	443.332	0.19466
413.379	0.05889	443.606	0.08255	443.606	0.19522
413.654	0.05792	443.88	0.08285	443.88	0.19578
413.929	0.05696	444.155	0.08315	444.155	0.19634
414.204	0.05601	444.429	0.08346	444.429	0.19689
414.48	0.05507	444.704	0.08376	444.704	0.19745
414.755	0.05414	444.978	0.08406	444.978	0.198
415.03	0.05322	445.252	0.08437	445.252	0.19855
415.305	0.0523	445.527	0.08467	445.527	0.19911
415.58	0.0514	445.801	0.08498	445.801	0.19966
415.855	0.0505	446.076	0.08528	446.076	0.20021
416.13	0.04961	446.35	0.08559	446.35	0.20076
416.405	0.04874	446.624	0.0859	446.624	0.2013
416.68	0.04787	446.899	0.08621	446.899	0.20185
416.955	0.047	447.173	0.08652	447.173	0.2024
417.23	0.04615	447.447	0.08683	447.447	0.20294
417.506	0.04531	447.722	0.08714	447.722	0.20348
417.781	0.04448	447.996	0.08745	447.996	0.20403
418.056	0.04365	448.27	0.08776	448.27	0.20457
418.331	0.04283	448.545	0.08808	448.545	0.20511
418.606	0.04203	448.819	0.08839	448.819	0.20565
418.881	0.04123	449.093	0.08871	449.093	0.20619
419.156	0.04044	449.368	0.08902	449.368	0.20672
419.431	0.03965	449.642	0.08934	449.642	0.20726
419.706	0.03888	449.916	0.08966	449.916	0.2078
419.981	0.03812	450.19	0.08997	450.19	0.20833
420.256	0.03736	450.465	0.09029	450.465	0.20886
420.531	0.03662	450.739	0.09061	450.739	0.2094
420.806	0.03588	451.013	0.09093	451.013	0.20993
421.081	0.03515	451.287	0.09126	451.287	0.21046
421.356	0.03443	451.562	0.09158	451.562	0.21099
421.631	0.03372	451.836	0.0919	451.836	0.21152
421.906	0.03302	452.11	0.09222	452.11	0.21204
422.18	0.03233	452.384	0.09255	452.384	0.21257
422.455	0.03165	452.659	0.09287	452.659	0.21309
422.73	0.03097	452.933	0.0932	452.933	0.21362
423.005	0.03031	453.207	0.09353	453.207	0.21414
423.28	0.02965	453.481	0.09385	453.481	0.21466
423.555	0.029	453.755	0.09418	453.755	0.21518
423.83	0.02836	454.03	0.09451	454.03	0.2157
424.105	0.02773	454.304	0.09484	454.304	0.21622
424.38	0.02711	454.578	0.09517	454.578	0.21674
424.655	0.02649	454.852	0.0955	454.852	0.21726
424.93	0.02589	455.126	0.09583	455.126	0.21777
425.204	0.0253	455.4	0.09617	455.4	0.21829
425.479	0.02471	455.675	0.0965	455.675	0.2188
425.754	0.02413	455.949	0.09683	455.949	0.21931
426.029	0.02356	456.223	0.09717	456.223	0.21983
426.304	0.023	456.497	0.0975	456.497	0.22034
426.579	0.02245	456.771	0.09784	456.771	0.22085
426.854	0.02191	457.045	0.09818	457.045	0.22135
427.128	0.02138	457.319	0.09852	457.319	0.22186
427.403	0.02085	457.593	0.09886	457.593	0.22237
427.678	0.02034	457.868	0.0992	457.868	0.22287
427.953	0.01983	458.142	0.09954	458.142	0.22338
428.228	0.01933	458.416	0.09988	458.416	0.22388
428.502	0.01884	458.69	0.10022	458.69	0.22438
428.777	0.01836	458.964	0.10056	458.964	0.22489
429.052	0.01789	459.238	0.10091	459.238	0.22539
429.327	0.01743	459.512	0.10125	459.512	0.22588
429.602	0.01698	459.786	0.10159	459.786	0.22638
429.876	0.01653	460.06	0.10194	460.06	0.22688
430.151	0.0161	460.334	0.10229	460.334	0.22738
430.426	0.01567	460.608	0.10263	460.608	0.22787
430.701	0.01525	460.882	0.10298	460.882	0.22837
430.975	0.01484	461.156	0.10333	461.156	0.22886
431.25	0.01444	461.43	0.10368	461.43	0.22935
431.525	0.01405	461.704	0.10403	461.704	0.22984
431.799	0.01367	461.978	0.10438	461.978	0.23033
432.074	0.01329	462.252	0.10474	462.252	0.23082
432.349	0.01293	462.526	0.10509	462.526	0.23131
432.624	0.01257	462.8	0.10544	462.8	0.2318
432.898	0.01222	463.074	0.1058	463.074	0.23228
433.173	0.01189	463.348	0.10615	463.348	0.23277
433.448	0.01156	463.622	0.10651	463.622	0.23325
433.722	0.01124	463.896	0.10686	463.896	0.23373
433.997	0.01092	464.17	0.10722	464.17	0.23421
434.272	0.01062	464.444	0.10758	464.444	0.23469
434.546	0.01033	464.718	0.10794	464.718	0.23517
434.821	0.01004	464.992	0.1083	464.992	0.23565
435.095	0.00977	465.266	0.10866	465.266	0.23613
435.37	0.0095	465.539	0.10902	465.539	0.23661
435.645	0.00924	465.813	0.10938	465.813	0.23708
435.919	0.00899	466.087	0.10974	466.087	0.23756
436.194	0.00875	466.361	0.11011	466.361	0.23803
436.469	0.00852	466.635	0.11047	466.635	0.2385
436.743	0.00829	466.909	0.11084	466.909	0.23897
437.018	0.00808	467.183	0.1112	467.183	0.23944
437.292	0.00787	467.457	0.11157	467.457	0.23991
437.567	0.00768	467.731	0.11194	467.731	0.24038
437.841	0.00723	468.004	0.11217	468.004	0.2407
438.116	0.00688	468.278	0.11269	468.278	0.2411
438.391	0.00637	468.552	0.11308	468.552	0.24146
438.665	0.00612	468.826	0.11337	468.826	0.24185
438.94	0.00581	469.1	0.11372	469.1	0.24224
439.214	0.00544	469.374	0.11417	469.374	0.24259
439.489	0.00465	469.647	0.11449	469.647	0.24291
439.763	0.0042	469.921	0.11485	469.921	0.2433
440.038	0.00354	470.195	0.1152	470.195	0.24365
440.312	0.00234	470.469	0.11534	470.469	0.24404
440.587	0.00181	470.743	0.11552	470.743	0.24439
440.861	0.0016	471.016	0.1158	471.016	0.24471
441.136	0.00113	471.29	0.11607	471.29	0.24505
441.41	0.000930273	471.564	0.11619	471.564	0.24541
441.685	0.000743245	471.838	0.11662	471.838	0.24577
441.959	0.000266164	472.111	0.1169	472.111	0.2461
442.234	0.000380751	472.385	0.11713	472.385	0.24644
442.508	0.000164274	472.659	0.11751	472.659	0.2468
442.783	0	472.933	0.11777	472.933	0.24718
443.057	0.000105717	473.206	0.11804	473.206	0.24743
443.332	0.0002665	473.48	0.11815	473.48	0.24771
443.606	0.000464058	473.754	0.11813	473.754	0.24801
443.88	0.00030713	474.027	0.1182	474.027	0.24836
444.155	0.000747339	474.301	0.11829	474.301	0.24866
444.429	0.0013	474.575	0.11846	474.575	0.2489
444.704	0.00162	474.849	0.11866	474.849	0.24928
444.978	0.00204	475.122	0.11887	475.122	0.24955
445.252	0.0024	475.396	0.11898	475.396	0.24982
445.527	0.00242	475.67	0.11922	475.67	0.25016
445.801	0.00271	475.943	0.11929	475.943	0.25043
446.076	0.00309	476.217	0.11958	476.217	0.25075
446.35	0.00296	476.491	0.1198	476.491	0.25111
446.624	0.00318	476.764	0.11999	476.764	0.25147
446.899	0.00319	477.038	0.12029	477.038	0.25179
447.173	0.00339	477.311	0.12025	477.311	0.25218
447.447	0.00368	477.585	0.1205	477.585	0.25253
447.722	0.00412	477.859	0.12073	477.859	0.25295
447.996	0.00426	478.132	0.12087	478.132	0.25337
448.27	0.0046	478.406	0.12115	478.406	0.25382
448.545	0.00497	478.679	0.1215	478.679	0.25416
448.819	0.00505	478.953	0.12192	478.953	0.25451
449.093	0.00512	479.227	0.12203	479.227	0.25491
449.368	0.00563	479.5	0.12225	479.5	0.2553
449.642	0.00597	479.774	0.12264	479.774	0.25577
449.916	0.00675	480.047	0.12301	480.047	0.25618
450.19	0.00763	480.321	0.12357	480.321	0.25657
450.465	0.00865	480.594	0.12383	480.594	0.25708
450.739	0.00891	480.868	0.12436	480.868	0.25753
451.013	0.00826	481.142	0.12479	481.142	0.2579
451.287	0.00759	481.415	0.12525	481.415	0.25838
451.562	0.00733	481.689	0.12584	481.689	0.25883
451.836	0.00762	481.962	0.12629	481.962	0.2593
452.11	0.00855	482.236	0.12672	482.236	0.25975
452.384	0.00938	482.509	0.12734	482.509	0.26023
452.659	0.01017	482.783	0.12777	482.783	0.26061
452.933	0.01143	483.056	0.12818	483.056	0.26105
453.207	0.0123	483.33	0.12888	483.33	0.26158
453.481	0.01325	483.603	0.12958	483.603	0.26203
453.755	0.01332	483.877	0.13007	483.877	0.26248
454.03	0.01417	484.15	0.13064	484.15	0.26302
454.304	0.01472	484.423	0.13144	484.423	0.26359
454.578	0.01516	484.697	0.13216	484.697	0.2641
454.852	0.01612	484.97	0.13284	484.97	0.26469
455.126	0.01678	485.244	0.13346	485.244	0.26529
455.4	0.01761	485.517	0.13437	485.517	0.26588
455.675	0.01833	485.791	0.13502	485.791	0.26639
455.949	0.01948	486.064	0.13572	486.064	0.26703
456.223	0.02043	486.337	0.13636	486.337	0.26765
456.497	0.02135	486.611	0.13696	486.611	0.26822
456.771	0.02205	486.884	0.13766	486.884	0.26882
457.045	0.02293	487.158	0.13853	487.158	0.26937
457.319	0.02401	487.431	0.13973	487.431	0.27006
457.593	0.02475	487.704	0.14043	487.704	0.27067
457.868	0.02537	487.978	0.1414	487.978	0.27128
458.142	0.02667	488.251	0.14243	488.251	0.27186
458.416	0.02738	488.525	0.14346	488.525	0.27252
458.69	0.02804	488.798	0.14421	488.798	0.27313
458.964	0.0294	489.071	0.14523	489.071	0.27367
459.238	0.03044	489.345	0.14625	489.345	0.2743
459.512	0.03122	489.618	0.14737	489.618	0.27505
459.786	0.03183	489.891	0.14824	489.891	0.27579
460.06	0.03278	490.165	0.1495	490.165	0.27657
460.334	0.03421	490.438	0.15066	490.438	0.27729
460.608	0.03483	490.711	0.15172	490.711	0.27807
460.882	0.03582	490.985	0.15302	490.985	0.27883
461.156	0.03638	491.258	0.15419	491.258	0.27969
461.43	0.0378	491.531	0.15516	491.531	0.28059
461.704	0.03866	491.804	0.1565	491.804	0.28147
461.978	0.03938	492.078	0.15787	492.078	0.28238
462.252	0.04007	492.351	0.15905	492.351	0.28337
462.526	0.04072	492.624	0.16041	492.624	0.28431
462.8	0.04142	492.897	0.16181	492.897	0.28535
463.074	0.04215	493.171	0.16304	493.171	0.28639
463.348	0.04258	493.444	0.1641	493.444	0.28748
463.622	0.04311	493.717	0.16539	493.717	0.28855
463.896	0.04404	493.99	0.16676	493.99	0.28963
464.17	0.04459	494.264	0.16802	494.264	0.29083
464.444	0.04551	494.537	0.1694	494.537	0.29193
464.718	0.04606	494.81	0.17086	494.81	0.29309
464.992	0.0467	495.083	0.17223	495.083	0.29436
465.266	0.04756	495.356	0.17381	495.356	0.29553
465.539	0.04828	495.63	0.17515	495.63	0.29679
465.813	0.04892	495.903	0.17667	495.903	0.29805
466.087	0.04989	496.176	0.17805	496.176	0.2993
466.361	0.05021	496.449	0.17958	496.449	0.3006
466.635	0.05114	496.722	0.18107	496.722	0.30185
466.909	0.05179	496.995	0.18264	496.995	0.30313
467.183	0.05237	497.269	0.18435	497.269	0.30447
467.457	0.05313	497.542	0.18591	497.542	0.30582
467.731	0.05398	497.815	0.18741	497.815	0.30717
468.004	0.05435	498.088	0.18929	498.088	0.30851
468.278	0.05483	498.361	0.19115	498.361	0.3099
468.552	0.05517	498.634	0.1927	498.634	0.31134
468.826	0.05589	498.907	0.19462	498.907	0.31289
469.1	0.05604	499.18	0.19635	499.18	0.31436
469.374	0.05648	499.454	0.19794	499.454	0.31592
469.647	0.05743	499.727	0.19991	499.727	0.31749
469.921	0.05752	500	0.2019	500	0.31914
470.195	0.05852	500.273	0.20383	500.273	0.32076
470.469	0.05882	500.546	0.20591	500.546	0.3225
470.743	0.05967	500.819	0.20774	500.819	0.32419
471.016	0.06043	501.092	0.20954	501.092	0.32591
471.29	0.06102	501.365	0.21147	501.365	0.32766
471.564	0.06175	501.638	0.21349	501.638	0.32939
471.838	0.06241	501.911	0.21548	501.911	0.3312
472.111	0.0625	502.184	0.2174	502.184	0.33302
472.385	0.06304	502.457	0.21977	502.457	0.33493
472.659	0.06353	502.73	0.22186	502.73	0.33678
472.933	0.06447	503.003	0.2242	503.003	0.33874
473.206	0.06506	503.276	0.22638	503.276	0.34066
473.48	0.06532	503.549	0.22865	503.549	0.34256
473.754	0.06554	503.822	0.23085	503.822	0.34452
474.027	0.06623	504.095	0.23313	504.095	0.34653
474.301	0.06668	504.368	0.23566	504.368	0.34852
474.575	0.06663	504.641	0.2381	504.641	0.35045
474.849	0.06706	504.914	0.24054	504.914	0.35255
475.122	0.06713	505.187	0.24307	505.187	0.35452
475.396	0.06782	505.46	0.24572	505.46	0.35669
475.67	0.06825	505.733	0.24823	505.733	0.35871
475.943	0.06797	506.006	0.25085	506.006	0.36071
476.217	0.06865	506.279	0.25343	506.279	0.36286
476.491	0.06888	506.552	0.25593	506.552	0.36498
476.764	0.06968	506.825	0.25844	506.825	0.36726
477.038	0.07013	507.098	0.26099	507.098	0.36949
477.311	0.07047	507.371	0.26373	507.371	0.37176
477.585	0.071	507.643	0.26642	507.643	0.37404
477.859	0.0715	507.916	0.26868	507.916	0.37635
478.132	0.07188	508.189	0.27118	508.189	0.37859
478.406	0.07183	508.462	0.27398	508.462	0.38095
478.679	0.07292	508.735	0.27662	508.735	0.38324
478.953	0.0731	509.008	0.2791	509.008	0.38559
479.227	0.07359	509.281	0.28191	509.281	0.38789
479.5	0.07422	509.554	0.28447	509.554	0.39027
479.774	0.07451	509.826	0.28734	509.826	0.39263
480.047	0.07519	510.099	0.29002	510.099	0.39502
480.321	0.07572	510.372	0.29287	510.372	0.39741
480.594	0.07622	510.645	0.29547	510.645	0.39986
480.868	0.07653	510.918	0.29807	510.918	0.40229
481.142	0.07703	511.191	0.30105	511.191	0.40472
481.415	0.07737	511.463	0.30367	511.463	0.40718
481.689	0.07831	511.736	0.30645	511.736	0.40962
481.962	0.07909	512.009	0.30922	512.009	0.41208
482.236	0.07963	512.282	0.31218	512.282	0.41461
482.509	0.08037	512.555	0.31508	512.555	0.41717
482.783	0.08133	512.827	0.31798	512.827	0.41973
483.056	0.08219	513.1	0.32094	513.1	0.42227
483.33	0.08279	513.373	0.32371	513.373	0.42492
483.603	0.08298	513.646	0.3265	513.646	0.42771
483.877	0.08321	513.918	0.32935	513.918	0.43067
484.15	0.08436	514.191	0.33206	514.191	0.43373
484.423	0.08483	514.464	0.33475	514.464	0.43663
484.697	0.08487	514.737	0.3377	514.737	0.43933
484.97	0.08527	515.009	0.34041	515.009	0.44203
485.244	0.08552	515.282	0.34342	515.282	0.44464
485.517	0.08592	515.555	0.34608	515.555	0.44725
485.791	0.08619	515.827	0.3491	515.827	0.44982
486.064	0.08655	516.1	0.35176	516.1	0.45243
486.337	0.08661	516.373	0.35423	516.373	0.45514
486.611	0.08673	516.646	0.35706	516.646	0.45775
486.884	0.08746	516.918	0.36003	516.918	0.46044
487.158	0.0883	517.191	0.36283	517.191	0.46315
487.431	0.08969	517.464	0.36588	517.464	0.46584
487.704	0.09018	517.736	0.36868	517.736	0.46863
487.978	0.09105	518.009	0.37147	518.009	0.47129
488.251	0.09214	518.282	0.37411	518.282	0.47402
488.525	0.09294	518.554	0.37695	518.554	0.47674
488.798	0.09368	518.827	0.37986	518.827	0.47947
489.071	0.09402	519.099	0.3828	519.099	0.4823
489.345	0.09524	519.372	0.38564	519.372	0.48499
489.618	0.096	519.645	0.3888	519.645	0.48774
489.891	0.09639	519.917	0.39165	519.917	0.49051
490.165	0.0969	520.19	0.39466	520.19	0.49332
490.438	0.09737	520.462	0.39746	520.462	0.49612
490.711	0.09811	520.735	0.40043	520.735	0.49888
490.985	0.09901	521.008	0.4033	521.008	0.50168
491.258	0.09991	521.28	0.40607	521.28	0.50453
491.531	0.10166	521.553	0.40894	521.553	0.50733
491.804	0.10255	521.825	0.41191	521.825	0.51015
492.078	0.10303	522.098	0.41446	522.098	0.51292
492.351	0.10358	522.37	0.41736	522.37	0.51575
492.624	0.1045	522.643	0.42016	522.643	0.51852
492.897	0.10547	522.916	0.42281	522.916	0.52136
493.171	0.1063	523.188	0.42559	523.188	0.52427
493.444	0.1073	523.461	0.42827	523.461	0.52719
493.717	0.10895	523.733	0.43102	523.733	0.52998
493.99	0.11048	524.006	0.43372	524.006	0.53282
494.264	0.11147	524.278	0.43642	524.278	0.53575
494.537	0.11339	524.551	0.43895	524.551	0.53872
494.81	0.11505	524.823	0.44186	524.823	0.54158
495.083	0.11667	525.096	0.44456	525.096	0.5445
495.356	0.11844	525.368	0.44749	525.368	0.54739
495.63	0.12036	525.641	0.45061	525.641	0.55028
495.903	0.12154	525.913	0.45338	525.913	0.55322
496.176	0.12351	526.185	0.4564	526.185	0.55619
496.449	0.12553	526.458	0.45941	526.458	0.55909
496.722	0.12715	526.73	0.46227	526.73	0.56201
496.995	0.1292	527.003	0.4651	527.003	0.56491
497.269	0.13071	527.275	0.46799	527.275	0.56784
497.542	0.13239	527.548	0.47081	527.548	0.57067
497.815	0.13449	527.82	0.47369	527.82	0.57365
498.088	0.13661	528.092	0.47688	528.092	0.57664
498.361	0.13829	528.365	0.48006	528.365	0.57962
498.634	0.14019	528.637	0.48318	528.637	0.5826
498.907	0.14223	528.91	0.48639	528.91	0.58555
499.18	0.144	529.182	0.48937	529.182	0.58853
499.454	0.14568	529.454	0.49264	529.454	0.59152
499.727	0.1474	529.727	0.49584	529.727	0.59442
500	0.14841	529.999	0.49886	529.999	0.59748
500.273	0.14972	530.271	0.50187	530.271	0.60041
500.546	0.15206	530.544	0.50516	530.544	0.6034
500.819	0.15423	530.816	0.50826	530.816	0.60645
501.092	0.15608	531.089	0.51151	531.089	0.60943
501.365	0.15883	531.361	0.51468	531.361	0.61237
501.638	0.16115	531.633	0.51776	531.633	0.6153
501.911	0.16371	531.905	0.52105	531.905	0.6182
502.184	0.16631	532.178	0.52446	532.178	0.62114
502.457	0.16843	532.45	0.52784	532.45	0.62411
502.73	0.17081	532.722	0.53103	532.722	0.6271
503.003	0.17395	532.995	0.53425	532.995	0.62992
503.276	0.17677	533.267	0.53772	533.267	0.63291
503.549	0.17948	533.539	0.54082	533.539	0.63591
503.822	0.18288	533.812	0.54401	533.812	0.63895
504.095	0.1858	534.084	0.54767	534.084	0.64179
504.368	0.18867	534.356	0.55104	534.356	0.64473
504.641	0.19177	534.628	0.55418	534.628	0.64769
504.914	0.19441	534.901	0.55752	534.901	0.65072
505.187	0.19738	535.173	0.56074	535.173	0.65366
505.46	0.19985	535.445	0.56425	535.445	0.65654
505.733	0.20317	535.717	0.56759	535.717	0.65941
506.006	0.20779	535.989	0.5711	535.989	0.66241
506.279	0.21242	536.262	0.57475	536.262	0.66526
506.552	0.21683	536.534	0.57807	536.534	0.66818
506.825	0.22073	536.806	0.5817	536.806	0.67107
507.098	0.22462	537.078	0.58526	537.078	0.674
507.371	0.22756	537.35	0.58892	537.35	0.67689
507.643	0.23105	537.623	0.59236	537.623	0.67981
507.916	0.23432	537.895	0.59617	537.895	0.68271
508.189	0.23776	538.167	0.59973	538.167	0.68562
508.462	0.24071	538.439	0.60313	538.439	0.6885
508.735	0.24493	538.711	0.60704	538.711	0.69144
509.008	0.24824	538.983	0.61057	538.983	0.69432
509.281	0.25207	539.256	0.61407	539.256	0.69712
509.554	0.2564	539.528	0.61775	539.528	0.7001
509.826	0.26024	539.8	0.62161	539.8	0.70287
510.099	0.26433	540.072	0.62525	540.072	0.70576
510.372	0.26809	540.344	0.62903	540.344	0.70857
510.645	0.27237	540.616	0.63269	540.616	0.71147
510.918	0.27573	540.888	0.63657	540.888	0.71428
511.191	0.27963	541.16	0.64059	541.16	0.71709
511.463	0.28295	541.433	0.64463	541.433	0.72001
511.736	0.28711	541.705	0.64814	541.705	0.72287
512.009	0.29122	541.977	0.65187	541.977	0.72569
512.282	0.29475	542.249	0.65531	542.249	0.72847
512.555	0.29892	542.521	0.65942	542.521	0.73131
512.827	0.3032	542.793	0.66322	542.793	0.73412
513.1	0.30719	543.065	0.66701	543.065	0.73688
513.373	0.31149	543.337	0.67095	543.337	0.73968
513.646	0.31642	543.609	0.67472	543.609	0.74251
513.918	0.32035	543.881	0.67845	543.881	0.74541
514.191	0.32457	544.153	0.68214	544.153	0.74831
514.464	0.32909	544.425	0.68584	544.425	0.75112
514.737	0.33402	544.697	0.68969	544.697	0.75387
515.009	0.3385	544.969	0.69326	544.969	0.75665
515.282	0.34253	545.241	0.69698	545.241	0.75948
515.555	0.34724	545.513	0.70079	545.513	0.76234
515.827	0.35177	545.785	0.70442	545.785	0.76518
516.1	0.35667	546.057	0.70804	546.057	0.76797
516.373	0.36092	546.329	0.712	546.329	0.77069
516.646	0.36663	546.601	0.71572	546.601	0.7734
516.918	0.37166	546.873	0.7194	546.873	0.77616
517.191	0.37628	547.145	0.72332	547.145	0.77894
517.464	0.38151	547.417	0.72683	547.417	0.78175
517.736	0.38621	547.689	0.73062	547.689	0.78442
518.009	0.39103	547.961	0.73421	547.961	0.78714
518.282	0.39601	548.233	0.73804	548.233	0.78991
518.554	0.40114	548.505	0.7419	548.505	0.7926
518.827	0.4059	548.776	0.74546	548.776	0.79533
519.099	0.41139	549.048	0.74946	549.048	0.79804
519.372	0.41651	549.32	0.75328	549.32	0.80071
519.645	0.42208	549.592	0.75689	549.592	0.80346
519.917	0.42737	549.864	0.76069	549.864	0.80608
520.19	0.43222	550.136	0.76437	550.136	0.80878
520.462	0.43734	550.408	0.76814	550.408	0.81141
520.735	0.44293	550.68	0.7717	550.68	0.81399
521.008	0.44807	550.952	0.77557	550.952	0.81668
521.28	0.45301	551.223	0.77929	551.223	0.81926
521.553	0.4585	551.495	0.78321	551.495	0.82193
521.825	0.46392	551.767	0.78719	551.767	0.82465
522.098	0.46894	552.039	0.79066	552.039	0.82727
522.37	0.47472	552.311	0.79444	552.311	0.82984
522.643	0.47968	552.583	0.79827	552.583	0.83246
522.916	0.48502	552.854	0.80186	552.854	0.83519
523.188	0.49092	553.126	0.8053	553.126	0.83785
523.461	0.49659	553.398	0.80917	553.398	0.84057
523.733	0.50183	553.67	0.81279	553.67	0.84322
524.006	0.50799	553.942	0.81666	553.942	0.84585
524.278	0.51364	554.213	0.82019	554.213	0.84831
524.551	0.51904	554.485	0.82371	554.485	0.85084
524.823	0.52498	554.757	0.82717	554.757	0.85332
525.096	0.53042	555.029	0.83057	555.029	0.85591
525.368	0.53616	555.3	0.83416	555.3	0.8583
525.641	0.54162	555.572	0.83765	555.572	0.86081
525.913	0.54708	555.844	0.84122	555.844	0.86325
526.185	0.55172	556.116	0.84478	556.116	0.86569
526.458	0.55708	556.387	0.84847	556.387	0.86811
526.73	0.56232	556.659	0.85186	556.659	0.8704
527.003	0.56881	556.931	0.85537	556.931	0.87276
527.275	0.57419	557.203	0.85872	557.203	0.87499
527.548	0.58063	557.474	0.86203	557.474	0.87733
527.82	0.58524	557.746	0.8652	557.746	0.87963
528.092	0.59045	558.018	0.8686	558.018	0.88183
528.365	0.59622	558.289	0.87165	558.289	0.88412
528.637	0.60173	558.561	0.87489	558.561	0.88637
528.91	0.60667	558.833	0.87802	558.833	0.88855
529.182	0.6122	559.104	0.881	559.104	0.89077
529.454	0.61755	559.376	0.88411	559.376	0.89297
529.727	0.62308	559.648	0.88701	559.648	0.89513
529.999	0.6288	559.919	0.89003	559.919	0.89735
530.271	0.63423	560.191	0.89324	560.191	0.89956
530.544	0.63961	560.463	0.89645	560.463	0.9017
530.816	0.64528	560.734	0.89928	560.734	0.90388
531.089	0.65036	561.006	0.90217	561.006	0.90598
531.361	0.65592	561.277	0.90547	561.277	0.908
531.633	0.66087	561.549	0.90843	561.549	0.90999
531.905	0.66616	561.821	0.91135	561.821	0.91193
532.178	0.6712	562.092	0.91437	562.092	0.91396
532.45	0.67569	562.364	0.91727	562.364	0.91582
532.722	0.68161	562.635	0.92037	562.635	0.91773
532.995	0.68734	562.907	0.92318	562.907	0.91968
533.267	0.69251	563.178	0.92593	563.178	0.9215
533.539	0.6969	563.45	0.92851	563.45	0.92338
533.812	0.70178	563.722	0.93123	563.722	0.92516
534.084	0.70671	563.993	0.93368	563.993	0.92697
534.356	0.71188	564.265	0.93613	564.265	0.92874
534.628	0.71773	564.536	0.9384	564.536	0.93052
534.901	0.72249	564.808	0.94072	564.808	0.93219
535.173	0.72829	565.079	0.94304	565.079	0.93398
535.445	0.73346	565.351	0.94539	565.351	0.93555
535.717	0.73894	565.622	0.94776	565.622	0.93723
535.989	0.74389	565.894	0.95016	565.894	0.93885
536.262	0.7492	566.165	0.95233	566.165	0.9404
536.534	0.75355	566.437	0.95432	566.437	0.94217
536.806	0.75801	566.708	0.95659	566.708	0.94376
537.078	0.76321	566.98	0.95832	566.98	0.94529
537.35	0.7679	567.251	0.96016	567.251	0.94683
537.623	0.7723	567.523	0.96197	567.523	0.94823
537.895	0.77746	567.794	0.96367	567.794	0.94966
538.167	0.78153	568.066	0.96536	568.066	0.95105
538.439	0.78627	568.337	0.96714	568.337	0.95224
538.711	0.79158	568.608	0.96882	568.608	0.95321
538.983	0.79626	568.88	0.97064	568.88	0.95411
539.256	0.80123	569.151	0.97209	569.151	0.95499
539.528	0.80623	569.423	0.97346	569.423	0.95606
539.8	0.81048	569.694	0.97522	569.694	0.9572
540.072	0.81499	569.965	0.97629	569.965	0.95837
540.344	0.81918	570.237	0.97781	570.237	0.95942
540.616	0.82371	570.508	0.97888	570.508	0.96056
540.888	0.82836	570.78	0.98011	570.78	0.96162
541.16	0.83393	571.051	0.98162	571.051	0.96261
541.433	0.83852	571.322	0.98301	571.322	0.96359
541.705	0.84292	571.594	0.98437	571.594	0.96468
541.977	0.8475	571.865	0.98544	571.865	0.96564
542.249	0.85094	572.136	0.98658	572.136	0.96655
542.521	0.85574	572.408	0.98765	572.408	0.96742
542.793	0.85951	572.679	0.9888	572.679	0.96833
543.065	0.86323	572.95	0.99006	572.95	0.96916
543.337	0.86646	573.222	0.99101	573.222	0.97001
543.609	0.87079	573.493	0.99176	573.493	0.97079
543.881	0.87448	573.764	0.99261	573.764	0.9715
544.153	0.87753	574.036	0.99353	574.036	0.97227
544.425	0.88105	574.307	0.99418	574.307	0.973
544.697	0.88528	574.578	0.99473	574.578	0.97372
544.969	0.88867	574.85	0.99499	574.85	0.97455
545.241	0.8922	575.121	0.99572	575.121	0.97522
545.513	0.8955	575.392	0.99621	575.392	0.97582
545.785	0.89882	575.663	0.99661	575.663	0.97655
546.057	0.9021	575.935	0.99714	575.935	0.9772
546.329	0.90501	576.206	0.99746	576.206	0.97784
546.601	0.90819	576.477	0.99761	576.477	0.97851
546.873	0.91122	576.748	0.99802	576.748	0.97921
547.145	0.91341	577.02	0.99817	577.02	0.97988
547.417	0.91607	577.291	0.99845	577.291	0.98046
547.689	0.91885	577.562	0.99886	577.562	0.98102
547.961	0.92202	577.833	0.9991	577.833	0.98153
548.233	0.92599	578.105	0.99942	578.105	0.98201
548.505	0.92845	578.376	0.99962	578.376	0.9825
548.776	0.9312	578.647	1	578.647	0.98306
549.048	0.93447	578.918	0.99972	578.918	0.98348
549.32	0.93726	579.189	0.99996	579.189	0.98393
549.592	0.93978	579.46	0.99973	579.46	0.98438
549.864	0.94247	579.732	0.99966	579.732	0.98482
550.136	0.94502	580.003	0.99934	580.003	0.98521
550.408	0.94748	580.274	0.99897	580.274	0.9856
550.68	0.95005	580.545	0.99869	580.545	0.98593
550.952	0.95237	580.816	0.99833	580.816	0.98626
551.223	0.95488	581.087	0.99784	581.087	0.98662
551.495	0.95726	581.358	0.99721	581.358	0.98694
551.767	0.95966	581.63	0.99637	581.63	0.98727
552.039	0.96147	581.901	0.99568	581.901	0.98756
552.311	0.96407	582.172	0.99488	582.172	0.98799
552.583	0.96568	582.443	0.99409	582.443	0.98816
552.854	0.96793	582.714	0.99303	582.714	0.9884
553.126	0.97025	582.985	0.99214	582.985	0.98865
553.398	0.97213	583.256	0.9911	583.256	0.9889
553.67	0.97402	583.527	0.98984	583.527	0.9891
553.942	0.97614	583.798	0.98893	583.798	0.98933
554.213	0.97786	584.069	0.98759	584.069	0.98954
554.485	0.97968	584.34	0.98643	584.34	0.98977
554.757	0.98245	584.611	0.98494	584.611	0.98991
555.029	0.98446	584.883	0.98366	584.883	0.99013
555.3	0.98596	585.154	0.98226	585.154	0.99025
555.572	0.98754	585.425	0.98091	585.425	0.99032
555.844	0.98908	585.696	0.97927	585.696	0.99041
556.116	0.9898	585.967	0.97772	585.967	0.99054
556.387	0.99139	586.238	0.97619	586.238	0.99057
556.659	0.99234	586.509	0.9746	586.509	0.99062
556.931	0.99298	586.78	0.97291	586.78	0.99072
557.203	0.99476	587.051	0.97095	587.051	0.99067
557.474	0.99556	587.322	0.96925	587.322	0.9907
557.746	0.99635	587.593	0.9677	587.593	0.99081
558.018	0.99703	587.864	0.96554	587.864	0.99069
558.289	0.99811	588.135	0.96388	588.135	0.99068
558.561	0.99801	588.405	0.96203	588.405	0.99066
558.833	0.99852	588.676	0.96001	588.676	0.99077
559.104	0.99923	588.947	0.95793	588.947	0.99073
559.376	0.99909	589.218	0.95604	589.218	0.99067
559.648	1	589.489	0.95402	589.489	0.99054
559.919	0.99964	589.76	0.95168	589.76	0.99043
560.191	0.99962	590.031	0.94937	590.031	0.99036
560.463	0.99978	590.302	0.94721	590.302	0.99034
560.734	0.99964	590.573	0.94469	590.573	0.99016
561.006	0.99994	590.844	0.94197	590.844	0.99017
561.277	0.99994	591.115	0.93961	591.115	0.99012
561.549	0.99912	591.386	0.93692	591.386	0.98992
561.821	0.99821	591.656	0.93432	591.656	0.98988
562.092	0.99875	591.927	0.93162	591.927	0.98979
562.364	0.99779	592.198	0.92929	592.198	0.98968
562.635	0.99739	592.469	0.92646	592.469	0.9896
562.907	0.99688	592.74	0.92365	592.74	0.9894
563.178	0.99677	593.011	0.92101	593.011	0.98939
563.45	0.99688	593.282	0.91807	593.282	0.98919
563.722	0.99652	593.552	0.91552	593.552	0.98911
563.993	0.99551	593.823	0.91251	593.823	0.98903
564.265	0.99454	594.094	0.90964	594.094	0.9889
564.536	0.99346	594.365	0.90656	594.365	0.98888
564.808	0.99223	594.636	0.90372	594.636	0.98878
565.079	0.99117	594.906	0.90065	594.906	0.98877
565.351	0.9897	595.177	0.89768	595.177	0.98864
565.622	0.98875	595.448	0.89456	595.448	0.9886
565.894	0.9881	595.719	0.89144	595.719	0.98859
566.165	0.98803	595.99	0.88826	595.99	0.98847
566.437	0.98632	596.26	0.88539	596.26	0.98845
566.708	0.9853	596.531	0.88245	596.531	0.98839
566.98	0.98455	596.802	0.87976	596.802	0.98848
567.251	0.98323	597.073	0.87663	597.073	0.98845
567.523	0.98181	597.343	0.87344	597.343	0.98836
567.794	0.98048	597.614	0.87031	597.614	0.98845
568.066	0.97924	597.885	0.86696	597.885	0.98849
568.337	0.97759	598.156	0.86404	598.156	0.98852
568.608	0.97582	598.426	0.86092	598.426	0.98854
568.88	0.97457	598.697	0.85808	598.697	0.98855
569.151	0.9727	598.968	0.85499	598.968	0.98856
569.423	0.97107	599.238	0.85202	599.238	0.98868
569.694	0.97013	599.509	0.84899	599.509	0.98878
569.965	0.96813	599.78	0.84601	599.78	0.98885
570.237	0.96594	600.05	0.84292	600.05	0.9888
570.508	0.96411	600.321	0.83997	600.321	0.98886
570.78	0.9623	600.592	0.83719	600.592	0.98895
571.051	0.96038	600.862	0.83411	600.862	0.98905
571.322	0.95686	601.133	0.83134	601.133	0.98918
571.594	0.95453	601.404	0.82855	601.404	0.98928
571.865	0.95241	601.674	0.8256	601.674	0.9893
572.136	0.94981	601.945	0.8229	601.945	0.98947
572.408	0.94744	602.216	0.81978	602.216	0.98962
572.679	0.94511	602.486	0.81706	602.486	0.98976
572.95	0.94305	602.757	0.81438	602.757	0.98981
573.222	0.9409	603.027	0.81143	603.027	0.98994
573.493	0.93822	603.298	0.80881	603.298	0.99002
573.764	0.9353	603.569	0.80567	603.569	0.9901
574.036	0.93239	603.839	0.80275	603.839	0.99037
574.307	0.92938	604.11	0.80006	604.11	0.99039
574.578	0.92616	604.38	0.79722	604.38	0.99053
574.85	0.92385	604.651	0.79435	604.651	0.99062
575.121	0.92142	604.921	0.79155	604.921	0.99088
575.392	0.91854	605.192	0.7891	605.192	0.99108
575.663	0.91536	605.463	0.78626	605.463	0.99115
575.935	0.91331	605.733	0.78355	605.733	0.99137
576.206	0.9097	606.004	0.78069	606.004	0.99164
576.477	0.90687	606.274	0.77775	606.274	0.99179
576.748	0.90422	606.545	0.775	606.545	0.99189
577.02	0.90099	606.815	0.77221	606.815	0.99227
577.291	0.89755	607.086	0.76936	607.086	0.99248
577.562	0.89527	607.356	0.76683	607.356	0.99262
577.833	0.89116	607.627	0.76441	607.627	0.99281
578.105	0.88791	607.897	0.76172	607.897	0.99295
578.376	0.88506	608.168	0.75898	608.168	0.993
578.647	0.88146	608.438	0.75614	608.438	0.99321
578.918	0.87831	608.709	0.75376	608.709	0.99345
579.189	0.87532	608.979	0.7512	608.979	0.99368
579.46	0.87234	609.249	0.74855	609.249	0.99393
579.732	0.86874	609.52	0.74601	609.52	0.99413
580.003	0.86569	609.79	0.74334	609.79	0.99443
580.274	0.8624	610.061	0.74086	610.061	0.99461
580.545	0.85937	610.331	0.73846	610.331	0.99475
580.816	0.85682	610.602	0.73565	610.602	0.99496
581.087	0.85299	610.872	0.73309	610.872	0.99526
581.358	0.84998	611.142	0.7307	611.142	0.9956
581.63	0.84581	611.413	0.72804	611.413	0.99577
581.901	0.84297	611.683	0.72527	611.683	0.99607
582.172	0.8386	611.954	0.72292	611.954	0.99632
582.443	0.8357	612.224	0.72058	612.224	0.9965
582.714	0.83196	612.494	0.71806	612.494	0.9968
582.985	0.82857	612.765	0.71567	612.765	0.99697
583.256	0.82544	613.035	0.71314	613.035	0.99722
583.527	0.82185	613.305	0.71068	613.305	0.9975
583.798	0.81813	613.576	0.70824	613.576	0.99775
584.069	0.81508	613.846	0.70565	613.846	0.99792
584.34	0.81134	614.116	0.70329	614.116	0.99805
584.611	0.80808	614.387	0.70083	614.387	0.99829
584.883	0.80432	614.657	0.69828	614.657	0.99829
585.154	0.80053	614.927	0.69589	614.927	0.99852
585.425	0.79766	615.198	0.69359	615.198	0.9986
585.696	0.79469	615.468	0.69133	615.468	0.99872
585.967	0.79132	615.738	0.68848	615.738	0.9989
586.238	0.78793	616.009	0.68598	616.009	0.99897
586.509	0.78433	616.279	0.68339	616.279	0.9991
586.78	0.78166	616.549	0.6807	616.549	0.99918
587.051	0.77849	616.819	0.67824	616.819	0.99934
587.322	0.77462	617.09	0.67558	617.09	0.99939
587.593	0.77084	617.36	0.67281	617.36	0.99937
587.864	0.76826	617.63	0.67023	617.63	0.99946
588.135	0.76494	617.9	0.66785	617.9	0.99951
588.405	0.76199	618.171	0.66524	618.171	0.9997
588.676	0.75902	618.441	0.66271	618.441	0.99974
588.947	0.75524	618.711	0.66048	618.711	0.9998
589.218	0.7512	618.981	0.65799	618.981	0.99975
589.489	0.74856	619.252	0.65566	619.252	0.9998
589.76	0.74468	619.522	0.65315	619.522	0.99986
590.031	0.74124	619.792	0.65063	619.792	0.99995
590.302	0.73753	620.062	0.64834	620.062	1
590.573	0.73372	620.332	0.64571	620.332	0.99997
590.844	0.73025	620.603	0.64327	620.603	1
591.115	0.72716	620.873	0.64104	620.873	0.99985
591.386	0.72419	621.143	0.63839	621.143	0.99987
591.656	0.72068	621.413	0.63618	621.413	0.99975
591.927	0.7175	621.683	0.63372	621.683	0.99964
592.198	0.71427	621.953	0.63131	621.953	0.99959
592.469	0.71066	622.223	0.629	622.223	0.99952
592.74	0.70751	622.494	0.62677	622.494	0.99944
593.011	0.70448	622.764	0.62451	622.764	0.99925
593.282	0.70053	623.034	0.62201	623.034	0.99916
593.552	0.69652	623.304	0.61958	623.304	0.99899
593.823	0.69294	623.574	0.61743	623.574	0.99893
594.094	0.68936	623.844	0.61506	623.844	0.99878
594.365	0.68611	624.114	0.61246	624.114	0.99851
594.636	0.68272	624.384	0.61016	624.384	0.99833
594.906	0.68029	624.654	0.60776	624.654	0.99825
595.177	0.67716	624.924	0.60557	624.924	0.99798
595.448	0.67396	625.195	0.60325	625.195	0.99786
595.719	0.67102	625.465	0.6008	625.465	0.99764
595.99	0.66796	625.735	0.59818	625.735	0.99754
596.26	0.6649	626.005	0.59535	626.005	0.99722
596.531	0.66131	626.275	0.59288	626.275	0.99686
596.802	0.65845	626.545	0.59035	626.545	0.99658
597.073	0.65537	626.815	0.58783	626.815	0.99628
597.343	0.65272	627.085	0.58538	627.085	0.99601
597.614	0.64935	627.355	0.58278	627.355	0.99573
597.885	0.64701	627.625	0.58016	627.625	0.99541
598.156	0.64373	627.895	0.57768	627.895	0.99513
598.426	0.64109	628.165	0.5751	628.165	0.9948
598.697	0.63871	628.435	0.57272	628.435	0.99457
598.968	0.63587	628.705	0.57017	628.705	0.99425
599.238	0.63319	628.975	0.56776	628.975	0.99382
599.509	0.63099	629.245	0.56528	629.245	0.99342
599.78	0.62845	629.515	0.56261	629.515	0.99304
600.05	0.6257	629.785	0.56009	629.785	0.99277
600.321	0.62247	630.055	0.55769	630.055	0.99226
600.592	0.6196	630.325	0.55491	630.325	0.99186
600.862	0.61735	630.595	0.55253	630.595	0.99146
601.133	0.61411	630.864	0.54998	630.864	0.99102
601.404	0.61223	631.134	0.54753	631.134	0.99046
601.674	0.61115	631.404	0.54489	631.404	0.98988
601.945	0.60892	631.674	0.54214	631.674	0.98944
602.216	0.60674	631.944	0.53957	631.944	0.98903
602.486	0.60456	632.214	0.53674	632.214	0.98845
602.757	0.60131	632.484	0.53391	632.484	0.988
603.027	0.59903	632.754	0.53105	632.754	0.98752
603.298	0.59693	633.024	0.52799	633.024	0.98696
603.569	0.59488	633.293	0.52546	633.293	0.98643
603.839	0.59231	633.563	0.52255	633.563	0.98582
604.11	0.58965	633.833	0.51967	633.833	0.98524
604.38	0.58752	634.103	0.51666	634.103	0.98468
604.651	0.58588	634.373	0.51388	634.373	0.98406
604.921	0.58294	634.643	0.51109	634.643	0.98348
605.192	0.58069	634.913	0.50834	634.913	0.98287
605.463	0.57855	635.182	0.50518	635.182	0.98222
605.733	0.57613	635.452	0.50231	635.452	0.98154
606.004	0.5742	635.722	0.49948	635.722	0.98091
606.274	0.57214	635.992	0.49685	635.992	0.98025
606.545	0.57051	636.262	0.49423	636.262	0.9797
606.815	0.56822	636.531	0.49144	636.531	0.97894
607.086	0.56659	636.801	0.4887	636.801	0.97823
607.356	0.56382	637.071	0.48594	637.071	0.97759
607.627	0.56136	637.341	0.4831	637.341	0.97691
607.897	0.55978	637.611	0.48055	637.611	0.97624
608.168	0.55759	637.88	0.47808	637.88	0.97556
608.438	0.5552	638.15	0.47541	638.15	0.97474
608.709	0.55338	638.42	0.47276	638.42	0.974
608.979	0.55181	638.69	0.47008	638.69	0.97318
609.249	0.54969	638.959	0.46754	638.959	0.97238
609.52	0.54754	639.229	0.46503	639.229	0.97151
609.79	0.54569	639.499	0.46254	639.499	0.97072
610.061	0.54383	639.768	0.45998	639.768	0.96994
610.331	0.54185	640.038	0.45752	640.038	0.96915
610.602	0.54002	640.308	0.45497	640.308	0.96831
610.872	0.53837	640.577	0.45243	640.577	0.96745
611.142	0.53686	640.847	0.4498	640.847	0.96669
611.413	0.53532	641.117	0.4474	641.117	0.96587
611.683	0.53313	641.387	0.44497	641.387	0.96511
611.954	0.53128	641.656	0.44254	641.656	0.96426
612.224	0.52996	641.926	0.44014	641.926	0.96341
612.494	0.52809	642.196	0.43781	642.196	0.96258
612.765	0.52624	642.465	0.43539	642.465	0.96171
613.035	0.52479	642.735	0.43289	642.735	0.96075
613.305	0.52363	643.004	0.43032	643.004	0.95981
613.576	0.52151	643.274	0.42817	643.274	0.95891
613.846	0.51998	643.544	0.42576	643.544	0.95806
614.116	0.51772	643.813	0.42349	643.813	0.95719
614.387	0.51652	644.083	0.42145	644.083	0.9563
614.657	0.51533	644.353	0.41946	644.353	0.95536
614.927	0.51374	644.622	0.41716	644.622	0.95445
615.198	0.5116	644.892	0.41501	644.892	0.95359
615.468	0.5098	645.161	0.41317	645.161	0.95261
615.738	0.50775	645.431	0.41117	645.431	0.95161
616.009	0.50675	645.7	0.40943	645.7	0.95077
616.279	0.50513	645.97	0.40766	645.97	0.94981
616.549	0.50332	646.24	0.40586	646.24	0.9488
616.819	0.50272	646.509	0.40401	646.509	0.94786
617.09	0.501	646.779	0.4024	646.779	0.94683
617.36	0.49949	647.048	0.40069	647.048	0.94583
617.63	0.49778	647.318	0.39918	647.318	0.94476
617.9	0.49553	647.587	0.39757	647.587	0.94377
618.171	0.49391	647.857	0.39606	647.857	0.94275
618.441	0.49348	648.126	0.39466	648.126	0.94168
618.711	0.49219	648.396	0.39328	648.396	0.94055
618.981	0.49067	648.665	0.39193	648.665	0.93939
619.252	0.48945	648.935	0.39067	648.935	0.93823
619.522	0.48796	649.204	0.3893	649.204	0.93702
619.792	0.48736	649.474	0.38822	649.474	0.93587
620.062	0.48571	649.743	0.38722	649.743	0.93461
620.332	0.48404	650.013	0.38609	650.013	0.93328
620.603	0.48232	650.282	0.38511	650.282	0.93205
620.873	0.48139	650.552	0.38424	650.552	0.93063
621.143	0.47975	650.821	0.38324	650.821	0.92931
621.413	0.47832	651.09	0.38208	651.09	0.92781
621.683	0.47692	651.36	0.3809	651.36	0.92635
621.953	0.47557	651.629	0.38022	651.629	0.925
622.223	0.47398	651.899	0.37928	651.899	0.92343
622.494	0.47247	652.168	0.37858	652.168	0.92184
622.764	0.47142	652.437	0.37791	652.437	0.92023
623.034	0.47049	652.707	0.37742	652.707	0.91857
623.304	0.46879	652.976	0.37669	652.976	0.91691
623.574	0.46776	653.246	0.37613	653.246	0.91519
623.844	0.46576	653.515	0.37547	653.515	0.91338
624.114	0.46309	653.784	0.37491	653.784	0.9115
624.384	0.46143	654.054	0.37432	654.054	0.90965
624.654	0.4608	654.323	0.37383	654.323	0.90777
624.924	0.45925	654.592	0.37335	654.592	0.90579
625.195	0.45797	654.862	0.37284	654.862	0.90375
625.465	0.45619	655.131	0.37245	655.131	0.90169
625.735	0.45545	655.401	0.37198	655.401	0.89958
626.005	0.45418	655.67	0.37164	655.67	0.89735
626.275	0.45288	655.939	0.37115	655.939	0.89513
626.545	0.45161	656.208	0.37076	656.208	0.89272
626.815	0.4505	656.478	0.37034	656.478	0.89035
627.085	0.44974	656.747	0.36974	656.747	0.88788
627.355	0.44819	657.016	0.36923	657.016	0.88536
627.625	0.44633	657.286	0.36882	657.286	0.88283
627.895	0.44523	657.555	0.36831	657.555	0.88024
628.165	0.44404	657.824	0.36798	657.824	0.87756
628.435	0.44252	658.093	0.36768	658.093	0.87475
628.705	0.44102	658.363	0.36728	658.363	0.87201
628.975	0.44001	658.632	0.36693	658.632	0.86918
629.245	0.43851	658.901	0.36653	658.901	0.86627
629.515	0.43661	659.17	0.36609	659.17	0.86322
629.785	0.43559	659.44	0.36537	659.44	0.86016
630.055	0.43444	659.709	0.36502	659.709	0.85708
630.325	0.43313	659.978	0.36443	659.978	0.85384
630.595	0.43229	660.247	0.36398	660.247	0.85053
630.864	0.43126	660.517	0.36355	660.517	0.84716
631.134	0.43055	660.786	0.36322	660.786	0.84377
631.404	0.429	661.055	0.36273	661.055	0.84012
631.674	0.42835	661.324	0.36237	661.324	0.83656
631.944	0.42635	661.593	0.36165	661.593	0.8329
632.214	0.42572	661.863	0.36094	661.863	0.82914
632.484	0.42447	662.132	0.36031	662.132	0.82531
632.754	0.42303	662.401	0.35979	662.401	0.82149
633.024	0.42187	662.67	0.3592	662.67	0.81752
633.293	0.42036	662.939	0.35851	662.939	0.8135
633.563	0.4188	663.208	0.35784	663.208	0.80937
633.833	0.41705	663.477	0.35716	663.477	0.80516
634.103	0.41584	663.747	0.35651	663.747	0.80086
634.373	0.41462	664.016	0.35569	664.016	0.79649
634.643	0.41276	664.285	0.35486	664.285	0.79206
634.913	0.41125	664.554	0.35401	664.554	0.78764
635.182	0.41016	664.823	0.35339	664.823	0.78304
635.452	0.40922	665.092	0.35222	665.092	0.77831
635.722	0.40791	665.361	0.3513	665.361	0.77356
635.992	0.40684	665.63	0.35054	665.63	0.76878
636.262	0.40552	665.899	0.34962	665.899	0.76391
636.531	0.40482	666.168	0.34863	666.168	0.75894
636.801	0.40346	666.438	0.34748	666.438	0.75394
637.071	0.40254	666.707	0.34634	666.707	0.7488
637.341	0.40165	666.976	0.34524	666.976	0.74373
637.611	0.40011	667.245	0.34427	667.245	0.73848
637.88	0.39975	667.514	0.34317	667.514	0.73316
638.15	0.39847	667.783	0.34201	667.783	0.72772
638.42	0.39737	668.052	0.34088	668.052	0.72236
638.69	0.396	668.321	0.33964	668.321	0.7169
638.959	0.39469	668.59	0.33846	668.59	0.71128
639.229	0.39344	668.859	0.33708	668.859	0.70571
639.499	0.39252	669.128	0.33548	669.128	0.69995
639.768	0.39125	669.397	0.33404	669.397	0.69422
640.038	0.38967	669.666	0.33247	669.666	0.68842
640.308	0.38825	669.935	0.33102	669.935	0.68254
640.577	0.38677	670.204	0.32957	670.204	0.67662
640.847	0.38598	670.473	0.32797	670.473	0.67064
641.117	0.38438	670.742	0.3264	670.742	0.66456
641.387	0.38352	671.011	0.3246	671.011	0.65844
641.656	0.38231	671.28	0.32293	671.28	0.65232
641.926	0.38105	671.548	0.32156	671.548	0.64618
642.196	0.37929	671.817	0.31978	671.817	0.63991
642.465	0.37831	672.086	0.31799	672.086	0.63363
642.735	0.37713	672.355	0.31612	672.355	0.62719
643.004	0.37567	672.624	0.31438	672.624	0.62084
643.274	0.37445	672.893	0.31233	672.893	0.61439
643.544	0.37311	673.162	0.31052	673.162	0.60793
643.813	0.37141	673.431	0.30849	673.431	0.60142
644.083	0.36984	673.7	0.30646	673.7	0.59477
644.353	0.3686	673.969	0.3045	673.969	0.58814
644.622	0.36739	674.238	0.3023	674.238	0.58143
644.892	0.36693	674.506	0.30006	674.506	0.57477
645.161	0.36559	674.775	0.29789	674.775	0.56807
645.431	0.36444	675.044	0.29563	675.044	0.56133
645.7	0.36309	675.313	0.2935	675.313	0.5545
645.97	0.36205	675.582	0.29119	675.582	0.54779
646.24	0.36053	675.851	0.28907	675.851	0.54092
646.509	0.35937	676.119	0.28682	676.119	0.53411
646.779	0.35778	676.388	0.2845	676.388	0.52727
647.048	0.35651	676.657	0.2821	676.657	0.52033
647.318	0.35519	676.926	0.2797	676.926	0.51353
647.587	0.35401	677.195	0.27731	677.195	0.50659
647.857	0.35294	677.464	0.2748	677.464	0.49965
648.126	0.35189	677.732	0.2723	677.732	0.49266
648.396	0.35091	678.001	0.26988	678.001	0.48574
648.665	0.35011	678.27	0.26738	678.27	0.47884
648.935	0.34923	678.539	0.26479	678.539	0.47183
649.204	0.34825	678.807	0.26223	678.807	0.46485
649.474	0.34705	679.076	0.25951	679.076	0.45797
649.743	0.3459	679.345	0.25693	679.345	0.45097
650.013	0.34429	679.614	0.25437	679.614	0.44396
650.282	0.34326	679.882	0.25194	679.882	0.43699
650.552	0.34148	680.151	0.2495	680.151	0.43008
650.821	0.34009	680.42	0.24697	680.42	0.42323
651.09	0.33868	680.689	0.24435	680.689	0.41636
651.36	0.33709	680.957	0.24173	680.957	0.40944
651.629	0.33578	681.226	0.23888	681.226	0.40257
651.899	0.3352	681.495	0.23613	681.495	0.39578
652.168	0.33392	681.763	0.2336	681.763	0.38898
652.437	0.33263	682.032	0.23094	682.032	0.38222
652.707	0.33137	682.301	0.2281	682.301	0.37546
652.976	0.32991	682.569	0.22525	682.569	0.36869
653.246	0.32884	682.838	0.22248	682.838	0.362
653.515	0.32715	683.107	0.21964	683.107	0.35548
653.784	0.3257	683.375	0.21686	683.375	0.34881
654.054	0.32447	683.644	0.21412	683.644	0.34221
654.323	0.3233	683.913	0.21127	683.913	0.33566
654.592	0.32254	684.181	0.20839	684.181	0.32919
654.862	0.3217	684.45	0.20572	684.45	0.32272
655.131	0.31996	684.719	0.20283	684.719	0.31627
655.401	0.31939	684.987	0.20011	684.987	0.30986
655.67	0.31807	685.256	0.1972	685.256	0.30357
655.939	0.31673	685.524	0.19447	685.524	0.29733
656.208	0.31557	685.793	0.19168	685.793	0.29109
656.478	0.31482	686.062	0.18878	686.062	0.28486
656.747	0.31375	686.33	0.18601	686.33	0.27878
657.016	0.31293	686.599	0.18329	686.599	0.27266
657.286	0.31181	686.867	0.18054	686.867	0.26671
657.555	0.31065	687.136	0.17782	687.136	0.26072
657.824	0.30915	687.404	0.17509	687.404	0.25484
658.093	0.30799	687.673	0.17241	687.673	0.24903
658.363	0.30706	687.941	0.16982	687.941	0.24327
658.632	0.30543	688.148	0.16734	688.148	0.23754
658.901	0.30384	688.417	0.16478	688.417	0.23195
659.17	0.30321	688.686	0.16206	688.686	0.22639
659.44	0.30228	688.954	0.15932	688.954	0.22092
659.709	0.30112	689.223	0.15684	689.223	0.21553
659.978	0.2998	689.492	0.15426	689.492	0.21019
660.247	0.29851	689.761	0.15174	689.761	0.20493
660.517	0.29708	690.03	0.14932	690.03	0.19977
660.786	0.29603	690.299	0.14664	690.299	0.19454
661.055	0.29493	690.568	0.14416	690.568	0.1895
661.324	0.29364	690.836	0.14158	690.836	0.18458
661.593	0.29236	691.105	0.13953	691.105	0.18016
661.863	0.29108	691.374	0.13749	691.374	0.1758
662.132	0.28979	691.643	0.13546	691.643	0.1715
662.401	0.28851	691.912	0.13345	691.912	0.16724
662.67	0.28722	692.18	0.13146	692.18	0.16304
662.939	0.28593	692.449	0.12947	692.449	0.1589
663.208	0.28464	692.718	0.1275	692.718	0.15481
663.477	0.28334	692.987	0.12554	692.987	0.15077
663.747	0.28205	693.255	0.12359	693.255	0.14678
664.016	0.28075	693.524	0.12166	693.524	0.14285
664.285	0.27945	693.793	0.11973	693.793	0.13897
664.554	0.27814	694.062	0.11783	694.062	0.13514
664.823	0.27684	694.33	0.11593	694.33	0.13137
665.092	0.27553	694.599	0.11405	694.599	0.12765
665.361	0.27422	694.868	0.11218	694.868	0.12399
665.63	0.27291	695.136	0.11032	695.136	0.12037
665.899	0.2716	695.405	0.10847	695.405	0.11682
666.168	0.27028	695.674	0.10664	695.674	0.11331
666.438	0.26897	695.942	0.10482	695.942	0.10986
666.707	0.26765	696.211	0.10302	696.211	0.10646
666.976	0.26633	696.48	0.10122	696.48	0.10311
667.245	0.265	696.749	0.09944	696.749	0.09982
667.514	0.26368	697.017	0.09767	697.017	0.09658
667.783	0.26235	697.286	0.09592	697.286	0.0934
668.052	0.26102	697.554	0.09418	697.554	0.09027
668.321	0.25969	697.823	0.09245	697.823	0.08719
668.59	0.25836	698.092	0.09073	698.092	0.08416
668.859	0.25702	698.36	0.08903	698.36	0.08119
669.128	0.25568	698.629	0.08734	698.629	0.07828
669.397	0.25434	698.898	0.08566	698.898	0.07541
669.666	0.253	699.166	0.08399	699.166	0.0726
669.935	0.25166	699.435	0.08234	699.435	0.06984
670.204	0.25031	699.703	0.0807	699.703	0.06714
670.473	0.24896	699.972	0.07907	699.972	0.06449
670.742	0.24761	700.241	0.07746	700.241	0.06189
671.011	0.24626	700.509	0.07586	700.509	0.05934
671.28	0.2449	700.778	0.07427	700.778	0.05685
671.548	0.24355	701.046	0.07269	701.046	0.05442
671.817	0.24219	701.315	0.07113	701.315	0.05203
672.086	0.24083	701.583	0.06958	701.583	0.0497
672.355	0.23946	701.852	0.06804	701.852	0.04742
672.624	0.2381	702.12	0.06652	702.12	0.0452
672.893	0.23673	702.389	0.06501	702.389	0.04303
673.162	0.23536	702.657	0.06351	702.657	0.04091
673.431	0.23399	702.926	0.06202	702.926	0.03885
673.7	0.23262	703.194	0.06055	703.194	0.03684
673.969	0.23124	703.463	0.05909	703.463	0.03488
674.238	0.22987	703.731	0.05764	703.731	0.03298
674.506	0.22849	704	0.0562	704	0.03113
674.775	0.2271	704.268	0.05478	704.268	0.02933
675.044	0.22572	704.537	0.05337	704.537	0.02759
675.313	0.22434	704.805	0.05198	704.805	0.0259
675.582	0.22295	705.074	0.05059	705.074	0.02426
675.851	0.22156	705.342	0.04922	705.342	0.02268
676.119	0.22017	705.611	0.04786	705.611	0.02115
676.388	0.21877	705.879	0.04652	705.879	0.01967
676.657	0.21738	706.148	0.04518	706.148	0.01825
676.926	0.21598	706.416	0.04387	706.416	0.01688
677.195	0.21458	706.684	0.04256	706.684	0.01557
677.464	0.21317	706.953	0.04126	706.953	0.0143
677.732	0.21177	707.221	0.03998	707.221	0.01309
678.001	0.21036	707.49	0.03871	707.49	0.01194
678.27	0.20895	707.758	0.03746	707.758	0.01084
678.539	0.20754	708.026	0.03622	708.026	0.00979
678.807	0.20613	708.295	0.03499	708.295	0.00879
679.076	0.20472	708.563	0.03377	708.563	0.00785
679.345	0.2033	708.831	0.03256	708.831	0.00696
679.614	0.20188	709.1	0.03137	709.1	0.00612
679.882	0.20046	709.368	0.03019	709.368	0.00534
680.151	0.19904	709.637	0.02903	709.637	0.00461
680.42	0.19761	709.905	0.02787	709.905	0.00394
680.689	0.19618	710.173	0.02673	710.173	0.00332
680.957	0.19475	710.442	0.02561	710.442	0.00275
681.226	0.19332	710.71	0.02449	710.71	0.00223
681.495	0.19189	710.978	0.02339	710.978	0.00177
681.763	0.19045	711.246	0.0223	711.246	0.00136
682.032	0.18902	711.515	0.02122	711.515	0.00101
682.301	0.18758	711.783	0.02016	711.783	0.000706632
682.569	0.18613	712.051	0.01911	712.051	0.000458512
682.838	0.18469	712.32	0.01807	712.32	0.000263789
683.107	0.18324	712.588	0.01705	712.588	0.000122463
683.375	0.1818	712.856	0.01603	712.856	3.4533e-05
683.644	0.18035	713.124	0.01503	713.124	0
683.913	0.17889	713.393	0.01405	713.393	1.88637e-05
684.181	0.17744	713.661	0.01307	713.661	9.11241e-05
684.45	0.17598	713.929	0.01211	713.929	0.000216781
684.719	0.17453	714.197	0.01116	714.197	0.000395835
684.987	0.17306	714.466	0.01023	714.466	0.000628285
685.256	0.1716	714.734	0.00931	714.734	0.000914132
685.524	0.17014	715.002	0.0084	715.002	0.00125
685.793	0.16867	715.27	0.0075	715.27	0.00165
686.062	0.1672	715.538	0.00661	715.538	0.00209
686.33	0.16573	715.807	0.00574	715.807	0.00259
686.599	0.16426	716.075	0.00488	716.075	0.00314
686.867	0.16278	716.343	0.00404	716.343	0.00375
687.136	0.16131	716.611	0.0032	716.611	0.00441
687.404	0.15983	716.879	0.00238	716.879	0.00512
687.673	0.15835	717.147	0.00158	717.147	0.00589
687.941	0.15686	717.416	0.000781911	717.416	0.00671
688.148	0.15538	717.684	0	717.684	0.00758

## Sheet: 5c
Wavelength	Single	dimer	trimer	tetramer	pentamer
7e-07	0	0	0	0.00943	0.06562
6.98249e-07	0.00206	0.00249	0.00398	0.01397	0.07132
6.96506e-07	0.00418	0.00511	0.00808	0.01865	0.07718
6.94772e-07	0.00638	0.00786	0.01231	0.02347	0.08321
6.93046e-07	0.00865	0.01076	0.01669	0.02844	0.08943
6.91329e-07	0.011	0.0138	0.02124	0.03359	0.09584
6.89621e-07	0.01342	0.01698	0.02595	0.03892	0.10247
6.87921e-07	0.01591	0.0203	0.03086	0.04444	0.10934
6.8623e-07	0.01847	0.02376	0.03597	0.05017	0.11645
6.84546e-07	0.0211	0.02734	0.0413	0.05612	0.12384
6.82871e-07	0.02379	0.03105	0.04685	0.0623	0.13152
6.81204e-07	0.02654	0.03487	0.05263	0.06871	0.13949
6.79545e-07	0.02935	0.03879	0.05865	0.07536	0.14777
6.77895e-07	0.03221	0.0428	0.06492	0.08227	0.15638
6.76252e-07	0.03512	0.0469	0.07143	0.08942	0.16531
6.74617e-07	0.03808	0.05108	0.0782	0.09683	0.17458
6.7299e-07	0.04109	0.05534	0.08521	0.1045	0.18419
6.71371e-07	0.04416	0.05967	0.09249	0.11244	0.19414
6.6976e-07	0.04729	0.06407	0.10002	0.12064	0.20443
6.68156e-07	0.05048	0.06857	0.10782	0.12911	0.21506
6.66561e-07	0.05374	0.07315	0.11589	0.13787	0.22605
6.64972e-07	0.05708	0.07785	0.12425	0.14693	0.23739
6.63391e-07	0.06051	0.08267	0.13292	0.1563	0.2491
6.61818e-07	0.06404	0.08763	0.14191	0.166	0.2612
6.60252e-07	0.06768	0.09277	0.15126	0.17605	0.27369
6.58694e-07	0.07144	0.09811	0.16098	0.18649	0.2866
6.57143e-07	0.07533	0.10368	0.17113	0.19733	0.29997
6.55599e-07	0.07936	0.1095	0.18173	0.2086	0.31383
6.54063e-07	0.08354	0.11561	0.19282	0.22034	0.32819
6.52533e-07	0.08787	0.12204	0.20444	0.23259	0.34312
6.51011e-07	0.09238	0.12882	0.21663	0.24536	0.35863
6.49496e-07	0.09705	0.13597	0.22944	0.2587	0.37476
6.47988e-07	0.10189	0.14351	0.24289	0.27263	0.39154
6.46486e-07	0.1069	0.15147	0.25702	0.28717	0.40899
6.44992e-07	0.11209	0.15985	0.27185	0.30234	0.42712
6.43505e-07	0.11744	0.16867	0.2874	0.31817	0.44594
6.42025e-07	0.12296	0.17793	0.30367	0.33465	0.46543
6.40551e-07	0.12864	0.18763	0.32068	0.35178	0.48558
6.39084e-07	0.13447	0.19776	0.33843	0.36957	0.50634
6.37624e-07	0.14044	0.20831	0.35688	0.388	0.52765
6.3617e-07	0.14655	0.21927	0.37604	0.40705	0.54946
6.34723e-07	0.1528	0.23063	0.39586	0.42669	0.57168
6.33283e-07	0.15917	0.24235	0.41633	0.44689	0.5942
6.31849e-07	0.16566	0.25443	0.43739	0.46761	0.61694
6.30422e-07	0.17227	0.26683	0.45901	0.48881	0.63977
6.29001e-07	0.17899	0.27954	0.48113	0.51044	0.66257
6.27586e-07	0.18582	0.29255	0.50372	0.53244	0.68521
6.26178e-07	0.19277	0.30583	0.52671	0.55476	0.70758
6.24776e-07	0.19983	0.31937	0.55005	0.57734	0.72956
6.2338e-07	0.207	0.33317	0.57368	0.60011	0.75103
6.21991e-07	0.2143	0.34722	0.59755	0.62301	0.77188
6.20608e-07	0.22173	0.36154	0.62159	0.64598	0.79202
6.19231e-07	0.22929	0.37612	0.64572	0.66894	0.81137
6.1786e-07	0.23699	0.39099	0.66989	0.69182	0.82985
6.16495e-07	0.24484	0.40617	0.69402	0.71457	0.84742
6.15136e-07	0.25284	0.42168	0.71802	0.73709	0.86402
6.13783e-07	0.261	0.43755	0.74181	0.75932	0.87965
6.12436e-07	0.26932	0.45381	0.76529	0.78117	0.89427
6.11095e-07	0.27782	0.4705	0.78835	0.80257	0.9079
6.0976e-07	0.28649	0.48765	0.81089	0.82342	0.92053
6.0843e-07	0.29533	0.50529	0.83278	0.84363	0.93218
6.07107e-07	0.30435	0.52343	0.85391	0.86312	0.94286
6.05789e-07	0.31355	0.54211	0.87413	0.88177	0.9526
6.04477e-07	0.32293	0.56132	0.89332	0.89948	0.96142
6.0317e-07	0.33249	0.58108	0.91132	0.91614	0.96933
6.01869e-07	0.34224	0.60136	0.92802	0.93164	0.97635
6.00574e-07	0.35218	0.62215	0.94327	0.94587	0.98247
5.99284e-07	0.36232	0.64341	0.95694	0.9587	0.98771
5.98e-07	0.37267	0.66508	0.96891	0.97001	0.99205
5.96721e-07	0.38325	0.68709	0.97908	0.97969	0.99548
5.95448e-07	0.39406	0.70936	0.98733	0.98763	0.99796
5.9418e-07	0.40514	0.7318	0.99361	0.99372	0.99948
5.92918e-07	0.41651	0.75428	0.99783	0.99787	1
5.91661e-07	0.42819	0.77668	0.99997	0.99998	0.99947
5.90409e-07	0.44022	0.79887	1	1	0.99786
5.89163e-07	0.45264	0.82068	0.99793	0.99787	0.99512
5.87921e-07	0.46548	0.84196	0.99378	0.99355	0.99121
5.86685e-07	0.47879	0.86254	0.98759	0.98704	0.9861
5.85455e-07	0.4926	0.88227	0.97945	0.97835	0.97975
5.84229e-07	0.50697	0.90097	0.96944	0.96752	0.97216
5.83008e-07	0.52191	0.91847	0.95767	0.95461	0.9633
5.81793e-07	0.53748	0.93463	0.94425	0.93973	0.95318
5.80583e-07	0.55368	0.94928	0.92932	0.92299	0.9418
5.79377e-07	0.57055	0.96228	0.91305	0.90453	0.92919
5.78177e-07	0.58808	0.97352	0.89556	0.88453	0.91539
5.76981e-07	0.60628	0.98288	0.87704	0.86316	0.90044
5.75791e-07	0.62513	0.99027	0.85764	0.84065	0.88441
5.74605e-07	0.6446	0.99562	0.83751	0.81721	0.86736
5.73425e-07	0.66464	0.99887	0.81683	0.79306	0.84938
5.72249e-07	0.68519	1	0.79573	0.76844	0.83056
5.71078e-07	0.70618	0.99901	0.77437	0.74359	0.811
5.69912e-07	0.7275	0.9959	0.75288	0.71873	0.7908
5.6875e-07	0.74904	0.99072	0.7314	0.69407	0.77006
5.67593e-07	0.77068	0.98353	0.71002	0.66983	0.7489
5.66441e-07	0.79227	0.9744	0.68887	0.64617	0.72742
5.65294e-07	0.81366	0.96344	0.66802	0.62327	0.70572
5.64151e-07	0.8347	0.95076	0.64756	0.60125	0.68392
5.63013e-07	0.85519	0.93648	0.62755	0.58022	0.66211
5.61879e-07	0.87498	0.92076	0.60804	0.56025	0.64038
5.6075e-07	0.89389	0.90374	0.58908	0.5414	0.61883
5.59626e-07	0.91173	0.88557	0.57068	0.52368	0.59752
5.58506e-07	0.92834	0.86642	0.55288	0.50707	0.57653
5.5739e-07	0.94355	0.84645	0.53567	0.49155	0.55592
5.56279e-07	0.95721	0.82582	0.51906	0.47706	0.53575
5.55172e-07	0.96917	0.80468	0.50304	0.46351	0.51605
5.5407e-07	0.97933	0.7832	0.48759	0.45083	0.49686
5.52972e-07	0.98756	0.7615	0.47269	0.43891	0.47821
5.51879e-07	0.99378	0.73972	0.45831	0.42763	0.46012
5.50789e-07	0.99794	0.71799	0.44441	0.4169	0.44259
5.49705e-07	1	0.69642	0.43096	0.40661	0.42564
5.48624e-07	0.99995	0.67509	0.41793	0.39664	0.40925
5.47547e-07	0.99778	0.65411	0.40528	0.38691	0.39343
5.46475e-07	0.99356	0.63352	0.39296	0.37734	0.37816
5.45407e-07	0.98731	0.6134	0.38095	0.36786	0.36344
5.44343e-07	0.97914	0.59378	0.36922	0.3584	0.34924
5.43284e-07	0.96913	0.5747	0.35772	0.34894	0.33555
5.42228e-07	0.9574	0.55617	0.34645	0.33945	0.32234
5.41176e-07	0.94409	0.53821	0.33536	0.3299	0.30961
5.40129e-07	0.92934	0.52082	0.32446	0.32031	0.29733
5.39086e-07	0.9133	0.50398	0.31372	0.31068	0.28549
5.38046e-07	0.89613	0.48769	0.30314	0.30103	0.27406
5.37011e-07	0.87801	0.47193	0.29272	0.29139	0.26304
5.3598e-07	0.85909	0.45667	0.28246	0.28179	0.25241
5.34952e-07	0.83954	0.4419	0.27236	0.27226	0.24215
5.33929e-07	0.81952	0.42759	0.26244	0.26284	0.23226
5.32909e-07	0.79919	0.41372	0.2527	0.25354	0.22273
5.31893e-07	0.77868	0.40025	0.24316	0.24442	0.21354
5.30881e-07	0.75813	0.38719	0.23383	0.23548	0.20468
5.29873e-07	0.73766	0.3745	0.22473	0.22675	0.19616
5.28869e-07	0.71739	0.36217	0.21587	0.21825	0.18796
5.27869e-07	0.6974	0.35019	0.20725	0.20998	0.18008
5.26872e-07	0.67778	0.33854	0.1989	0.20196	0.1725
5.25879e-07	0.65861	0.32724	0.19082	0.19418	0.16522
5.2489e-07	0.63992	0.31627	0.18302	0.18664	0.15823
5.23905e-07	0.62178	0.30563	0.17548	0.17934	0.15153
5.22923e-07	0.6042	0.29533	0.16823	0.17227	0.14509
5.21945e-07	0.58721	0.28537	0.16125	0.16543	0.13892
5.20971e-07	0.57082	0.27575	0.15454	0.15881	0.13301
5.2e-07	0.55503	0.26649	0.14809	0.1524	0.12734
5.19033e-07	0.53984	0.25759	0.1419	0.14619	0.1219
5.18069e-07	0.52523	0.24905	0.13594	0.14019	0.11669
5.17109e-07	0.5112	0.24087	0.13023	0.13438	0.11168
5.16153e-07	0.49772	0.23307	0.12473	0.12876	0.10689
5.152e-07	0.48478	0.22563	0.11945	0.12334	0.10229
5.14251e-07	0.47235	0.21855	0.11437	0.11811	0.09787
5.13305e-07	0.46041	0.21183	0.10948	0.11308	0.09363
5.12362e-07	0.44894	0.20546	0.10478	0.10823	0.08955
5.11423e-07	0.43791	0.19942	0.10025	0.10357	0.08564
5.10488e-07	0.42732	0.19371	0.09589	0.09909	0.08188
5.09556e-07	0.41712	0.1883	0.09169	0.0948	0.07826
5.08627e-07	0.40732	0.18318	0.08765	0.09068	0.07479
5.07702e-07	0.39789	0.17833	0.08376	0.08674	0.07144
5.0678e-07	0.38881	0.17372	0.08001	0.08295	0.06822
5.05861e-07	0.38007	0.16933	0.07641	0.07932	0.06512
5.04946e-07	0.37165	0.16513	0.07294	0.07582	0.06214
5.04034e-07	0.36355	0.16111	0.06959	0.07246	0.05925
5.03125e-07	0.35573	0.15725	0.06637	0.06921	0.05647
5.0222e-07	0.3482	0.15351	0.06326	0.06607	0.05378
5.01317e-07	0.34094	0.14988	0.06026	0.06301	0.05117
5.00418e-07	0.33392	0.14634	0.05736	0.06004	0.04864
4.99523e-07	0.32715	0.14288	0.05455	0.05715	0.04619
4.9863e-07	0.32059	0.13948	0.05183	0.05431	0.0438
4.97741e-07	0.31424	0.13614	0.04918	0.05153	0.04147
4.96855e-07	0.30809	0.13284	0.04661	0.04881	0.03919
4.95972e-07	0.30212	0.12959	0.0441	0.04613	0.03697
4.95092e-07	0.29631	0.12637	0.04164	0.0435	0.0348
4.94215e-07	0.29065	0.1232	0.03924	0.04092	0.03267
4.93341e-07	0.28514	0.12008	0.03688	0.03839	0.03059
4.92471e-07	0.27975	0.117	0.03458	0.03592	0.02855
4.91603e-07	0.27449	0.11398	0.03232	0.0335	0.02655
4.90739e-07	0.26935	0.11102	0.03011	0.03113	0.0246
4.89877e-07	0.26431	0.10814	0.02794	0.02884	0.0227
4.89019e-07	0.25939	0.10534	0.02583	0.02661	0.02084
4.88163e-07	0.25458	0.10263	0.02377	0.02445	0.01904
4.87311e-07	0.24987	0.10003	0.02177	0.02237	0.0173
4.86461e-07	0.24529	0.09753	0.01984	0.02036	0.01563
4.85615e-07	0.24082	0.09516	0.01797	0.01844	0.01401
4.84771e-07	0.23649	0.09291	0.01618	0.0166	0.01248
4.83931e-07	0.23229	0.09079	0.01447	0.01485	0.01101
4.83093e-07	0.22824	0.0888	0.01284	0.01318	0.00963
4.82258e-07	0.22434	0.08695	0.01131	0.0116	0.00833
4.81426e-07	0.22062	0.08524	0.00986	0.01011	0.00712
4.80597e-07	0.21708	0.08366	0.00851	0.00872	0.006
4.79771e-07	0.21372	0.08222	0.00726	0.00741	0.00497
4.78947e-07	0.21057	0.08091	0.00611	0.00621	0.00404
4.78127e-07	0.20762	0.07973	0.00507	0.0051	0.0032
4.77309e-07	0.20489	0.07867	0.00412	0.00409	0.00246
4.76494e-07	0.20238	0.07773	0.00328	0.00319	0.00182
4.75682e-07	0.20009	0.07691	0.00254	0.0024	0.00127
4.74872e-07	0.19803	0.07619	0.0019	0.00171	0.000826102
4.74066e-07	0.19619	0.07558	0.00136	0.00114	0.000475766
4.73262e-07	0.19458	0.07506	0.000926887	0.000684418	0.000222363
4.7246e-07	0.19318	0.07464	0.000592689	0.000341805	6.38595e-05
4.71662e-07	0.19201	0.07432	0.00035793	0.000113665	0
4.70866e-07	0.19103	0.07408	0.000221586	8.09005e-07	2.87495e-05
4.70073e-07	0.19026	0.07393	0.000182117	0	0.000148836
4.69283e-07	0.18969	0.07387	0.000239013	0.00010962	0.000358478
4.68495e-07	0.18929	0.07389	0.000389197	0.000325624	0.000655386
4.67709e-07	0.18907	0.07401	0.000631132	0.000643159	0.00104
4.66927e-07	0.18901	0.07422	0.000962255	0.00106	0.0015
4.66147e-07	0.18911	0.07451	0.00138	0.00156	0.00204
4.6537e-07	0.18936	0.07491	0.00188	0.00216	0.00266
4.64595e-07	0.18975	0.0754	0.00246	0.00283	0.00336
4.63823e-07	0.19027	0.07599	0.00312	0.00357	0.00412
4.63053e-07	0.19091	0.07668	0.00385	0.00439	0.00495
4.62286e-07	0.19167	0.07748	0.00464	0.00527	0.00583
4.61521e-07	0.19255	0.07837	0.0055	0.0062	0.00678
4.60759e-07	0.19355	0.07937	0.00642	0.00719	0.00778
4.6e-07	0.19465	0.08047	0.00739	0.00824	0.00883
4.59243e-07	0.19585	0.08167	0.00841	0.00934	0.00993
4.58488e-07	0.19717	0.08296	0.00948	0.01048	0.01107
4.57736e-07	0.19858	0.08434	0.0106	0.01168	0.01226
4.56987e-07	0.2001	0.08581	0.01176	0.01292	0.01348
4.5624e-07	0.20172	0.08735	0.01295	0.01421	0.01473
4.55495e-07	0.20344	0.08896	0.01419	0.01554	0.01602
4.54753e-07	0.20526	0.09063	0.01546	0.01692	0.01734
4.54013e-07	0.20718	0.09236	0.01677	0.01834	0.01868
4.53276e-07	0.20918	0.09414	0.01811	0.01981	0.02006
4.52541e-07	0.21128	0.09595	0.01949	0.02131	0.02146
4.51808e-07	0.21346	0.09779	0.02091	0.02286	0.02289
4.51078e-07	0.21573	0.09966	0.02236	0.02444	0.02434
4.5035e-07	0.21808	0.10154	0.02384	0.02605	0.02582
4.49624e-07	0.22049	0.10343	0.02536	0.02769	0.02731
4.48901e-07	0.22298	0.10534	0.02691	0.02936	0.02883
4.4818e-07	0.22553	0.10724	0.02849	0.03105	0.03036
4.47461e-07	0.22813	0.10915	0.0301	0.03276	0.03192
4.46745e-07	0.23079	0.11107	0.03173	0.03448	0.03349
4.46031e-07	0.23349	0.11298	0.03339	0.03622	0.03507
4.45319e-07	0.23624	0.11491	0.03507	0.03796	0.03667
4.4461e-07	0.23903	0.11684	0.03676	0.03972	0.03828
4.43902e-07	0.24185	0.11878	0.03848	0.04148	0.03989
4.43197e-07	0.24471	0.12074	0.0402	0.04325	0.04152
4.42495e-07	0.24759	0.12273	0.04194	0.04503	0.04314
4.41794e-07	0.25051	0.12474	0.04368	0.04681	0.04478
4.41096e-07	0.25346	0.12678	0.04543	0.04861	0.04641
4.404e-07	0.25643	0.12887	0.04718	0.05041	0.04805
4.39706e-07	0.25944	0.13099	0.04894	0.05222	0.04969
4.39014e-07	0.26248	0.13316	0.0507	0.05404	0.05133
4.38325e-07	0.26555	0.13538	0.05246	0.05588	0.05297
4.37637e-07	0.26865	0.13764	0.05424	0.05773	0.05461
4.36952e-07	0.2718	0.13996	0.05601	0.05959	0.05625
4.36269e-07	0.27498	0.14232	0.0578	0.06146	0.05789
4.35588e-07	0.2782	0.14473	0.05959	0.06334	0.05953
4.34909e-07	0.28147	0.14718	0.0614	0.06523	0.06117
4.34232e-07	0.28477	0.14967	0.06322	0.06712	0.0628
4.33558e-07	0.28812	0.15219	0.06504	0.06902	0.06444
4.32885e-07	0.29151	0.15473	0.06688	0.07092	0.06608
4.32215e-07	0.29494	0.1573	0.06874	0.07281	0.06772
4.31546e-07	0.29841	0.15988	0.0706	0.07471	0.06935
4.3088e-07	0.30191	0.16246	0.07247	0.07659	0.07098
4.30216e-07	0.30545	0.16503	0.07436	0.07847	0.07261
4.29554e-07	0.30902	0.1676	0.07624	0.08034	0.07424
4.28893e-07	0.31262	0.17015	0.07813	0.0822	0.07585
4.28235e-07	0.31624	0.17268	0.08002	0.08404	0.07746
4.27579e-07	0.31988	0.17519	0.08191	0.08588	0.07907
4.26925e-07	0.32353	0.17766	0.0838	0.08771	0.08066
4.26273e-07	0.3272	0.18011	0.08567	0.08953	0.08225
4.25623e-07	0.33087	0.18253	0.08754	0.09135	0.08382
4.24975e-07	0.33456	0.18493	0.0894	0.09316	0.08538
4.24328e-07	0.33824	0.1873	0.09125	0.09496	0.08693
4.23684e-07	0.34193	0.18964	0.09309	0.09677	0.08847
4.23042e-07	0.34563	0.19198	0.09492	0.09858	0.09
4.22402e-07	0.34932	0.1943	0.09674	0.10038	0.09152
4.21763e-07	0.35302	0.19661	0.09855	0.10219	0.09303
4.21127e-07	0.35672	0.19893	0.10036	0.10399	0.09453
4.20492e-07	0.36043	0.20126	0.10216	0.10579	0.09602
4.1986e-07	0.36415	0.20361	0.10396	0.10759	0.0975
4.19229e-07	0.36788	0.20598	0.10575	0.10939	0.09897
4.186e-07	0.37162	0.20837	0.10755	0.11118	0.10043
4.17973e-07	0.37537	0.2108	0.10935	0.11296	0.10189
4.17348e-07	0.37915	0.21326	0.11115	0.11473	0.10334
4.16725e-07	0.38294	0.21576	0.11295	0.11648	0.10478
4.16103e-07	0.38676	0.2183	0.11475	0.11822	0.10622
4.15484e-07	0.3906	0.22087	0.11656	0.11995	0.10764
4.14866e-07	0.39447	0.22348	0.11836	0.12166	0.10905
4.1425e-07	0.39836	0.22612	0.12016	0.12335	0.11046
4.13636e-07	0.40227	0.22878	0.12196	0.12503	0.11185
4.13024e-07	0.40621	0.23146	0.12376	0.12668	0.11323
4.12414e-07	0.41017	0.23415	0.12554	0.12833	0.1146
4.11805e-07	0.41415	0.23685	0.12732	0.12997	0.11595
4.11198e-07	0.41815	0.23954	0.12908	0.13159	0.11729
4.10593e-07	0.42216	0.24222	0.13083	0.1332	0.11861
4.0999e-07	0.42618	0.24488	0.13257	0.13481	0.11992
4.09389e-07	0.43021	0.24752	0.13429	0.13641	0.12122
4.08789e-07	0.43424	0.25012	0.136	0.13801	0.1225
4.08191e-07	0.43827	0.25268	0.1377	0.13961	0.12377
4.07595e-07	0.4423	0.2552	0.13939	0.14121	0.12502
4.07e-07	0.44632	0.25768	0.14106	0.1428	0.12627
4.06408e-07	0.45034	0.2601	0.14273	0.14439	0.12751
4.05817e-07	0.45435	0.26249	0.14439	0.14597	0.12873
4.05227e-07	0.45835	0.26483	0.14604	0.14755	0.12995
4.0464e-07	0.46235	0.26713	0.14769	0.14912	0.13116
4.04054e-07	0.46633	0.2694	0.14933	0.15067	0.13236
4.0347e-07	0.47031	0.27164	0.15098	0.15222	0.13355
4.02887e-07	0.47429	0.27386	0.15262	0.15375	0.13473
4.02307e-07	0.47826	0.27607	0.15426	0.15526	0.13591
4.01727e-07	0.48224	0.27827	0.15589	0.15676	0.13707
4.0115e-07	0.48622	0.28048	0.15752	0.15823	0.13823
4.00574e-07	0.49021	0.2827	0.15915	0.15969	0.13937
4e-07	0.49421	0.28494	0.16077	0.16113	0.1405

## Sheet: 5d
Single		small clusters		large clusters
0.35	0.38	0.38	0.4	0.35	0.32
0.35	0.38	0.38	0.4	0.35	0.32
0.38	0.44	0.38	0.4	0.36	0.32
0.38	0.43	0.38	0.4	0.36	0.32
0.38	0.42	0.38	0.4	0.36	0.33
0.38	0.43	0.35	0.36	0.36	0.33
0.37	0.42	0.35	0.36	0.37	0.33
0.39	0.44	0.37	0.38	0.37	0.34
0.4	0.45	0.37	0.38	0.34	0.31
0.4	0.45	0.37	0.38	0.34	0.31
0.34	0.37	0.37	0.38	0.34	0.32
0.34	0.37	0.37	0.38	0.34	0.31
0.37	0.43	0.39	0.4	0.34	0.32
0.38	0.43	0.39	0.4	0.35	0.32
0.37	0.43	0.39	0.41	0.35	0.32
0.37	0.42	0.39	0.42	0.35	0.32
0.37	0.42	0.39	0.41	0.35	0.32
0.39	0.44	0.35	0.37	0.35	0.33
0.39	0.44	0.35	0.37	0.36	0.33
0.34	0.37	0.37	0.38	0.37	0.34
0.34	0.37	0.37	0.38	0.38	0.36
0.37	0.41	0.37	0.38	0.33	0.3
0.37	0.41	0.37	0.38	0.34	0.31
0.37	0.41	0.37	0.38	0.34	0.31
0.37	0.41	0.39	0.41	0.34	0.31
0.37	0.4	0.39	0.4	0.34	0.31
0.38	0.42	0.39	0.41	0.34	0.31
0.38	0.42	0.39	0.41	0.34	0.32
0.39	0.43	0.39	0.41	0.34	0.32
0.39	0.45	0.36	0.37	0.34	0.32
0.39	0.45	0.36	0.36	0.35	0.32
0.35	0.38	0.35	0.35	0.35	0.32
0.34	0.36	0.35	0.35	0.35	0.33
0.34	0.36	0.36	0.35	0.36	0.34
0.37	0.4	0.36	0.35	0.37	0.35
0.37	0.4	0.36	0.36	0.38	0.36
0.36	0.39	0.36	0.36	0.39	0.37
0.36	0.39	0.36	0.36	0.33	0.3
0.36	0.39	0.38	0.4	0.33	0.3
0.38	0.41	0.38	0.4	0.46	0.53
0.38	0.41	0.38	0.4	0.46	0.52
0.38	0.42	0.38	0.4	0.45	0.52
0.39	0.44	0.38	0.4	0.45	0.52
0.39	0.44	0.4	0.42	0.45	0.52
0.35	0.38	0.4	0.41	0.46	0.52
0.34	0.36	0.41	0.44	0.46	0.52
0.34	0.37	0.35	0.37	0.46	0.52
0.37	0.4	0.36	0.37	0.34	0.32
0.37	0.4	0.36	0.36	0.34	0.32
0.36	0.39	0.35	0.35	0.34	0.32
0.36	0.39	0.35	0.35	0.35	0.33
0.36	0.39	0.36	0.35	0.36	0.34
0.38	0.41	0.36	0.35	0.36	0.35
0.38	0.41	0.36	0.36	0.38	0.36
0.38	0.42	0.36	0.36	0.39	0.37
0.39	0.44	0.36	0.36	0.4	0.39
0.39	0.43	0.38	0.4	0.33	0.3
0.36	0.43	0.38	0.4	0.33	0.3
0.36	0.4	0.38	0.4	0.45	0.51
0.36	0.4	0.38	0.4	0.44	0.51
0.37	0.42	0.38	0.4	0.44	0.5
0.37	0.42	0.4	0.41	0.44	0.5
0.37	0.42	0.4	0.41	0.44	0.5
0.37	0.41	0.41	0.44	0.44	0.5
0.37	0.42	0.35	0.36	0.44	0.5
0.38	0.43	0.36	0.36	0.45	0.51
0.38	0.43	0.35	0.36	0.45	0.51
0.39	0.44	0.35	0.35	0.45	0.52
0.39	0.46	0.35	0.35	0.45	0.52
0.4	0.46	0.36	0.36	0.46	0.53
0.36	0.43	0.36	0.36	0.34	0.33
0.35	0.39	0.36	0.36	0.35	0.33
0.36	0.4	0.36	0.36	0.36	0.34
0.37	0.43	0.36	0.36	0.37	0.35
0.37	0.43	0.38	0.4	0.37	0.36
0.37	0.43	0.38	0.4	0.39	0.38
0.37	0.42	0.38	0.4	0.4	0.39
0.38	0.42	0.38	0.4	0.32	0.3
0.38	0.43	0.38	0.4	0.33	0.3
0.38	0.43	0.4	0.41	0.45	0.52
0.39	0.44	0.39	0.41	0.44	0.5
0.4	0.46	0.41	0.43	0.44	0.5
0.39	0.46	0.35	0.36	0.44	0.49
0.37	0.43	0.36	0.36	0.44	0.49
0.35	0.39	0.35	0.35	0.44	0.49
0.36	0.4	0.35	0.35	0.44	0.49
0.38	0.44	0.35	0.35	0.44	0.5
0.38	0.44	0.36	0.36	0.44	0.5
0.37	0.42	0.36	0.36	0.44	0.5
0.37	0.42	0.36	0.36	0.44	0.5
0.37	0.42	0.36	0.36	0.45	0.51
0.38	0.44	0.36	0.36	0.45	0.52
0.39	0.44	0.38	0.39	0.34	0.32
0.39	0.45	0.38	0.4	0.35	0.33
0.4	0.47	0.38	0.4	0.35	0.34
0.4	0.46	0.38	0.4	0.36	0.35
0.35	0.4	0.38	0.4	0.36	0.35
0.35	0.4	0.39	0.41	0.38	0.37
0.38	0.44	0.39	0.41	0.39	0.38
0.38	0.44	0.4	0.42	0.41	0.4
0.37	0.43	0.41	0.44	0.32	0.3
0.37	0.43	0.35	0.36	0.45	0.52
0.38	0.43	0.35	0.36	0.44	0.51
0.39	0.45	0.35	0.36	0.43	0.49
0.39	0.45	0.35	0.35	0.43	0.49
0.4	0.46	0.35	0.35	0.44	0.49
0.4	0.48	0.36	0.36	0.43	0.49
0.4	0.47	0.36	0.36	0.43	0.49
0.35	0.4	0.36	0.36	0.43	0.49
0.35	0.4	0.36	0.36	0.44	0.49
0.38	0.44	0.36	0.36	0.44	0.49
0.38	0.44	0.38	0.39	0.44	0.49
0.37	0.43	0.38	0.4	0.44	0.5
0.37	0.42	0.38	0.4	0.44	0.5
0.38	0.43	0.38	0.4	0.45	0.52
0.39	0.44	0.38	0.4	0.34	0.32
0.39	0.45	0.4	0.41	0.34	0.32
0.4	0.46	0.39	0.41	0.35	0.33
0.4	0.46	0.4	0.43	0.36	0.34
0.4	0.47	0.41	0.44	0.36	0.35
0.36	0.4	0.41	0.44	0.37	0.36
0.36	0.4	0.36	0.37	0.38	0.37
0.37	0.42	0.36	0.37	0.39	0.38
0.37	0.42	0.36	0.36	0.33	0.3
0.36	0.41	0.36	0.36	0.45	0.54
0.36	0.4	0.36	0.36	0.43	0.5
0.36	0.41	0.37	0.37	0.43	0.49
0.38	0.42	0.37	0.36	0.43	0.48
0.38	0.42	0.37	0.37	0.43	0.48
0.39	0.44	0.37	0.37	0.43	0.48
0.38	0.44	0.37	0.37	0.43	0.48
0.38	0.44	0.39	0.41	0.43	0.48
0.36	0.4	0.39	0.41	0.43	0.48
0.36	0.4	0.39	0.41	0.43	0.48
0.37	0.42	0.39	0.41	0.43	0.48
0.37	0.42	0.39	0.4	0.43	0.48
0.37	0.41	0.4	0.42	0.43	0.49
0.37	0.4	0.39	0.42	0.44	0.49
0.37	0.41	0.4	0.43	0.44	0.5
0.38	0.42	0.41	0.45	0.45	0.52
0.37	0.42	0.41	0.45	0.34	0.32
0.38	0.43	0.36	0.37	0.35	0.33
0.38	0.44	0.36	0.37	0.35	0.33
0.38	0.44	0.36	0.37	0.35	0.34
0.38	0.44	0.36	0.36	0.36	0.35
0.38	0.44	0.36	0.36	0.37	0.36
0.37	0.43	0.37	0.37	0.39	0.38
0.37	0.42	0.37	0.37	0.41	0.41
0.37	0.42	0.37	0.37	0.33	0.3
0.38	0.43	0.37	0.37	0.45	0.53
0.38	0.44	0.37	0.37	0.43	0.5
0.38	0.45	0.39	0.4	0.43	0.48
0.38	0.45	0.39	0.41	0.43	0.48
0.38	0.45	0.39	0.4	0.43	0.48
0.38	0.45	0.38	0.4	0.43	0.48
		0.39	0.41	0.43	0.48
		0.4	0.42	0.43	0.48
		0.4	0.42	0.43	0.48
		0.4	0.43	0.43	0.48
		0.41	0.45	0.43	0.48
		0.41	0.45	0.43	0.48
		0.36	0.37	0.43	0.49
		0.37	0.37	0.44	0.49
		0.36	0.37	0.44	0.49
		0.36	0.36	0.45	0.51
		0.36	0.36	0.46	0.53
		0.37	0.36	0.34	0.32
		0.37	0.36	0.35	0.33
		0.37	0.36	0.35	0.34
		0.37	0.36	0.36	0.35
		0.37	0.37	0.37	0.36
		0.39	0.4	0.38	0.38
		0.39	0.41	0.4	0.4
		0.39	0.4	0.33	0.3
		0.39	0.4	0.33	0.3
		0.39	0.4	0.44	0.51
		0.4	0.42	0.43	0.49
		0.4	0.42	0.43	0.48
		0.41	0.43	0.43	0.48
		0.42	0.45	0.43	0.48
		0.42	0.45	0.43	0.48
		0.37	0.37	0.43	0.48
		0.37	0.37	0.43	0.48
		0.36	0.36	0.43	0.48
		0.36	0.36	0.43	0.48
		0.37	0.37	0.43	0.48
		0.37	0.37	0.43	0.48
		0.37	0.37	0.43	0.48
		0.37	0.37	0.43	0.48
		0.37	0.37	0.44	0.49
		0.39	0.41	0.44	0.5
		0.39	0.41	0.45	0.52
		0.39	0.4	0.34	0.32
		0.39	0.4	0.35	0.33
		0.39	0.4	0.35	0.33
		0.4	0.42	0.36	0.35
		0.4	0.42	0.37	0.36
		0.41	0.43	0.38	0.38
		0.42	0.45	0.4	0.4
		0.42	0.46	0.33	0.3
		0.36	0.37	0.44	0.52
		0.37	0.38	0.43	0.5
		0.37	0.37	0.43	0.49
		0.36	0.36	0.42	0.47
		0.36	0.36	0.42	0.47
		0.36	0.36	0.43	0.48
		0.37	0.37	0.43	0.48
		0.37	0.37	0.43	0.47
		0.37	0.37	0.43	0.47
		0.37	0.37	0.43	0.47
		0.39	0.4	0.43	0.47
		0.39	0.4	0.43	0.47
		0.39	0.41	0.43	0.47
		0.39	0.4	0.43	0.48
		0.39	0.41	0.43	0.48
		0.4	0.42	0.43	0.48
		0.4	0.42	0.44	0.49
		0.41	0.43	0.45	0.51
		0.42	0.45	0.46	0.53
		0.42	0.45	0.34	0.32
		0.38	0.39	0.35	0.33
		0.38	0.39	0.36	0.34
		0.38	0.39	0.36	0.35
		0.38	0.39	0.37	0.37
		0.38	0.39	0.39	0.39
		0.38	0.39	0.41	0.41
		0.38	0.39	0.33	0.29
		0.39	0.4	0.44	0.51
		0.39	0.41	0.43	0.49
		0.39	0.4	0.43	0.48
		0.39	0.4	0.42	0.47
		0.39	0.4	0.43	0.47
		0.39	0.41	0.43	0.48
		0.39	0.41	0.43	0.47
		0.38	0.38	0.43	0.47
		0.38	0.39	0.43	0.47
		0.38	0.39	0.43	0.47
		0.38	0.39	0.43	0.47
		0.38	0.39	0.43	0.47
		0.38	0.4	0.43	0.47
		0.38	0.39	0.43	0.48
		0.39	0.4	0.43	0.48
		0.39	0.4	0.43	0.48
		0.39	0.41	0.44	0.49
		0.39	0.41	0.44	0.5
		0.39	0.41	0.46	0.52
		0.39	0.41	0.34	0.32
		0.39	0.41	0.34	0.32
		0.39	0.41	0.35	0.34
		0.39	0.41	0.36	0.35
		0.39	0.4	0.37	0.36
		0.39	0.41	0.39	0.39
		0.39	0.4	0.4	0.4
		0.4	0.42	0.46	0.53
		0.4	0.42	0.43	0.5
		0.4	0.42	0.43	0.49
		0.4	0.43	0.43	0.48
		0.4	0.42	0.42	0.47
		0.4	0.42	0.42	0.47
		0.39	0.41	0.43	0.47
		0.4	0.42	0.43	0.47
		0.41	0.43	0.43	0.47
		0.41	0.43	0.43	0.47
		0.4	0.42	0.43	0.47
		0.4	0.42	0.43	0.47
		0.4	0.41	0.43	0.47
		0.4	0.43	0.43	0.47
		0.4	0.43	0.43	0.47
				0.43	0.48
				0.43	0.48
				0.44	0.49
				0.44	0.5
				0.45	0.52
				0.34	0.32
				0.34	0.32
				0.35	0.34
				0.36	0.34
				0.37	0.36
				0.38	0.39
				0.4	0.4
				0.33	0.29
				0.43	0.5
				0.43	0.49
				0.42	0.48
				0.43	0.47
				0.42	0.47
				0.43	0.47
				0.43	0.47
				0.43	0.47
				0.43	0.47
				0.43	0.47
				0.43	0.47
				0.43	0.47
				0.43	0.47
				0.43	0.48
				0.43	0.48
				0.43	0.48
				0.44	0.49
				0.44	0.5
				0.45	0.52
				0.34	0.32
				0.34	0.32
				0.35	0.33
				0.36	0.34
				0.37	0.36
				0.38	0.38
				0.4	0.4
				0.46	0.53
				0.44	0.5
				0.43	0.48
				0.42	0.47
				0.42	0.48
				0.43	0.47
				0.43	0.47
				0.43	0.47
				0.43	0.47
				0.43	0.47
				0.43	0.47
				0.43	0.47
				0.43	0.47
				0.43	0.47
				0.43	0.48
				0.43	0.48
				0.43	0.48
				0.44	0.49
				0.44	0.5
				0.45	0.52
				0.34	0.32
				0.34	0.32
				0.35	0.33
				0.35	0.34
				0.37	0.36
				0.38	0.38
				0.4	0.4
				0.46	0.53
				0.44	0.5
				0.43	0.48
				0.42	0.47
				0.43	0.47
				0.43	0.47
				0.43	0.47
				0.43	0.47
				0.43	0.47
				0.43	0.47
				0.43	0.47
				0.43	0.47
				0.43	0.48
				0.43	0.48
				0.43	0.48
				0.43	0.48
				0.43	0.48
				0.44	0.49
				0.44	0.5
				0.46	0.52
				0.34	0.32
				0.34	0.32
				0.35	0.33
				0.36	0.34
				0.37	0.36
				0.38	0.38
				0.4	0.39
				0.33	0.3
				0.45	0.51
				0.43	0.49
				0.42	0.47
				0.42	0.47
				0.43	0.47
				0.43	0.47
				0.43	0.47
				0.43	0.47
				0.43	0.47
				0.43	0.47
				0.43	0.47
				0.43	0.48
				0.43	0.48
				0.43	0.48
				0.43	0.48
				0.43	0.48
				0.44	0.49
				0.44	0.5
				0.46	0.52
				0.34	0.32
				0.34	0.32
				0.35	0.34
				0.36	0.34
				0.37	0.36
				0.38	0.38
				0.4	0.39
				0.33	0.3
				0.45	0.52
				0.44	0.49
				0.43	0.48
				0.43	0.48
				0.43	0.47
				0.43	0.47
				0.43	0.47
				0.43	0.47
				0.43	0.47
				0.43	0.47
				0.43	0.47
				0.43	0.48
				0.43	0.48
				0.43	0.48
				0.43	0.48
				0.43	0.49
				0.44	0.5
				0.44	0.51
				0.46	0.52
				0.34	0.32
				0.34	0.32
				0.35	0.34
				0.36	0.34
				0.37	0.36
				0.38	0.38
				0.4	0.39
				0.34	0.3
				0.33	0.3
				0.44	0.51
				0.43	0.48
				0.43	0.48
				0.43	0.48
				0.43	0.47
				0.43	0.47
				0.43	0.47
				0.43	0.47
				0.43	0.47
				0.43	0.48
				0.43	0.48
				0.43	0.48
				0.43	0.48
				0.43	0.48
				0.44	0.49
				0.44	0.5
				0.45	0.51
				0.46	0.53
				0.34	0.32
				0.35	0.33
				0.36	0.34
				0.36	0.35
				0.37	0.36
				0.39	0.38
				0.4	0.39
				0.34	0.3
				0.34	0.3
				0.45	0.52
				0.44	0.49
				0.43	0.48
				0.43	0.48
				0.43	0.48
				0.43	0.48
				0.43	0.48
				0.43	0.48
				0.43	0.48
				0.43	0.48
				0.43	0.48
				0.43	0.49
				0.44	0.49
				0.44	0.49
				0.44	0.49
				0.45	0.51
				0.45	0.52
				0.34	0.32
				0.35	0.33
				0.35	0.33
				0.36	0.34
				0.36	0.35
				0.37	0.36
				0.39	0.38
				0.4	0.39
				0.35	0.31
				0.34	0.3
				0.34	0.31
				0.45	0.51
				0.44	0.49
				0.43	0.49
				0.43	0.49
				0.43	0.48
				0.43	0.49
				0.44	0.49
				0.44	0.49
				0.44	0.49
				0.44	0.49
				0.44	0.49
				0.44	0.5
				0.44	0.5
				0.45	0.51
				0.45	0.52
				0.34	0.32
				0.34	0.32
				0.35	0.33
				0.35	0.34
				0.36	0.35
				0.36	0.35
				0.37	0.36
				0.39	0.38
				0.4	0.39
				0.35	0.31
				0.34	0.31
				0.34	0.31
				0.46	0.53
				0.45	0.5
				0.44	0.49
				0.44	0.49
				0.44	0.49
				0.44	0.49
				0.44	0.49
				0.44	0.5
				0.44	0.5
				0.44	0.5
				0.44	0.5
				0.45	0.51
				0.45	0.51
				0.45	0.52
				0.46	0.53
				0.34	0.32
				0.35	0.33
				0.35	0.33
				0.36	0.34
				0.36	0.35
				0.37	0.36
				0.37	0.37
				0.39	0.38
				0.4	0.39
				0.35	0.31
				0.34	0.31
				0.34	0.31
				0.45	0.51
				0.45	0.5
				0.44	0.5
				0.44	0.49
				0.44	0.49
				0.44	0.5
				0.45	0.51
				0.44	0.51
				0.45	0.51
				0.45	0.51
				0.45	0.52
				0.45	0.52
				0.46	0.53
				0.34	0.32
				0.35	0.33
				0.35	0.33
				0.35	0.34
				0.36	0.34
				0.37	0.36
				0.37	0.36
				0.38	0.37
				0.39	0.38
				0.36	0.32
				0.35	0.32
				0.35	0.32
				0.34	0.31
				0.46	0.53
				0.45	0.51
				0.45	0.51
				0.45	0.51
				0.45	0.52
				0.45	0.52
				0.45	0.52
				0.45	0.52
				0.46	0.52
				0.34	0.32
				0.34	0.32
				0.34	0.32
				0.35	0.33
				0.35	0.34
				0.36	0.34
				0.36	0.35
				0.36	0.35
				0.37	0.36
				0.38	0.37
				0.38	0.37
				0.4	0.38
				0.36	0.32
				0.35	0.32
				0.35	0.31
				0.34	0.31
				0.46	0.53
				0.46	0.52
				0.46	0.52
				0.45	0.52
				0.45	0.52
				0.45	0.52
				0.46	0.53
				0.34	0.32
				0.34	0.32
				0.34	0.32
				0.35	0.33
				0.35	0.33
				0.35	0.34
				0.36	0.34
				0.36	0.35
				0.37	0.36
				0.38	0.37
				0.38	0.37
				0.39	0.38
				0.36	0.32
				0.35	0.32
				0.35	0.32
				0.35	0.32
				0.34	0.32
				0.34	0.32
				0.34	0.32
				0.34	0.32
				0.35	0.32
				0.34	0.32
				0.35	0.33
				0.35	0.33
				0.35	0.34
				0.36	0.34
				0.36	0.35
				0.37	0.36
				0.37	0.37
				0.38	0.37
				0.39	0.37
				0.39	0.38
				0.4	0.38
				0.36	0.33
				0.36	0.33
				0.36	0.33
				0.35	0.33
				0.35	0.33
				0.35	0.33
				0.35	0.33
				0.35	0.33
				0.35	0.33
				0.35	0.34
				0.35	0.34
				0.36	0.34
				0.36	0.35
				0.37	0.36
				0.38	0.37
				0.39	0.38
				0.4	0.39
				0.4	0.38
				0.4	0.38
				0.37	0.34
				0.37	0.34
				0.36	0.34
				0.36	0.34
				0.36	0.34
				0.36	0.34
				0.36	0.34
				0.36	0.34
				0.37	0.35
				0.37	0.35
				0.37	0.36
				0.37	0.36
				0.38	0.37
				0.39	0.38
				0.4	0.39
				0.41	0.4
				0.38	0.35
				0.37	0.35
				0.37	0.35
				0.37	0.35
				0.37	0.36
				0.37	0.35
				0.38	0.36
				0.38	0.37
				0.38	0.37
				0.39	0.37
				0.39	0.38
				0.4	0.39
				0.39	0.36
				0.39	0.37
				0.39	0.36
				0.39	0.37
				0.4	0.38
				0.4	0.38
				0.4	0.38
