# Supplementary material for: Tracking endocytosis and intracellular distribution of spherical nucleic acids with correlative single-cell imaging
Source: Springer Nature journal article supplement (doi:10.1038/s41596-020-00420-1), 2020-12-07
Supplement: MOESM6 [file 41596_2020_420_MOESM6_ESM25.xlsx]

## Sheet: Sheet1
Single	Small Cluster	Large Cluster
0.88261	0.06101	0.05482

## Sheet: Sheet2
Single	Small Cluster	Large Cluster
0.359629	0.457541	0.182831
